# Supplementary material for: The kinetics of the polyurethane moisture curing reaction: a combined experimental and DFT mechanistic study
Source: Royal Society of Chemistry journal article supplement (doi:10.1039/d4re00385c), 2024-09-30
Supplement: d4re00385c1.pdf [file d4re00385c1.pdf]

*Supplementary Materials for*

**The kinetics of polyurethane moisture curing reaction: A combined experimental and DFT mechanistic study**

*Jie Zhou, Zhen Liu, Zhihua Zhu, Zuoxiang Zeng, Li Sun\**

*School of Chemical Engineering, East China University of Science and Technology,  
Shanghai 200237, China*

\*Corresponding author: Li Sun, E-mail: [sunli@ecust.edu.cn](mailto:sunli@ecust.edu.cn)

In order to perform in-situ transmission infrared studies, nitrogen gas is usually used as the driving force, and by setting up a bubbler in the middle section of the gas circuit, the gas is mixed with water vapor so that it reacts with the -NCO groups in the polyurethane. This enables the process of gradually increasing the ambient humidity from near zero to the experimentally specified humidity. The purpose of this design is to achieve the specified humidity quickly during the initial reaction phase, thus reducing the effect of experimental error.

In wet-curing polyurethane hot melt adhesives, the reaction between isocyanate groups and water molecules is very fast. By controlling the humidity of the reaction environment, the amount of water molecules can be adjusted and the rate of reaction can be regulated. This control enables the rapid attainment of a specified humidity level at an early stage, resulting in more accurate and reliable experimental data.

However, precise control of humidity is difficult to achieve with the equipment configuration of a bubbler and gas flow meter alone. In the process of debugging the gas circuit, this paper found that there is a nonlinear variation relationship between gas velocity and gas circuit humidity. As the gas velocity increases, the humidity will first rise and then decline in the trend. When the gas velocity reaches a certain value, the humidity will instead begin to decline. The reason for this phenomenon is that too fast air velocity will cause the bubbler to produce too many large bubbles, and these bubbles fail to stay in the water long enough to carry water vapor effectively, preventing the humidity of the air path from rising further. When the experimental humidity is relatively low, the air velocity will also decrease, which will limit the rate of change of the airway humidity, thus increasing the possibility of experimental error. Therefore, the interrelationship between gas velocity and humidity needs to be considered comprehensively in the experimental design to determine the optimal operating parameters.

Notably, the selection of an appropriate experimental humidity range is also critical to the accuracy and reliability of the study results. Humidity conditions that are either too low or too high may adversely affect the conduct of the polyurethane wet curing reaction. Too low a humidity may result in a reaction rate that is too slow to achieve the intended degree of cure. Too much humidity, on the other hand, may cause unwanted side reactions or material failure. Therefore, the characteristics of the polyurethane hot melt adhesive under study and the required curing conditions need to be fully considered in the experimental design in order to select a suitable humidity range.

In this paper, a gas circuit configuration consisting of a drying gas circuit in parallel with a humidifying gas circuit is designed to achieve joint control of the humidity of the gas entering the in-situ cell. This gas path configuration consists of one branch set up with a bubbler and the other branch set up with a drying tube, and the flow rates of the branch gases are separately controlled by flow meters (Fig. S1). With this gas path configuration, the humidity of the gas in the humidified gas section can be increased while the flow rate of the gas in the drying gas section is increased, thereby realizing precise control of the humidity of the combined gas to maintain it at a predetermined target humidity condition. At the same time, increasing the flow rate of the drying gas section can increase the rate of change of humidity in the in-situ cell, effectively reducing the error generated by the experimental operation.

The design of this parallel air path has several advantages. Firstly, the humidity of the gas can be accurately controlled by the humidification gas path to ensure that the humidity change in the experiment meets the predetermined requirements. Secondly, by increasing the flow rate of the drying gas path, the rate of change of humidity in the in-situ cell can be increased, effectively reducing the experimental error. In addition, the design provides simultaneous control of humidity and temperature, allowing researchers to conduct experiments over a wider range of conditions to investigate the effects of different humidity and temperature on the wet-curing reaction of polyurethane.

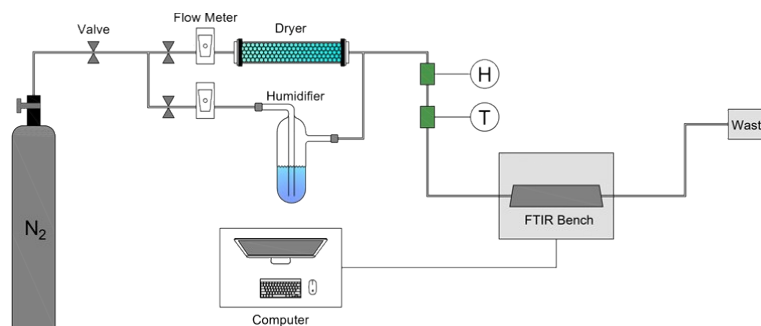

Fig. S1 In-situ infrared reaction cell

T: Thermometer; H: Hygrometer

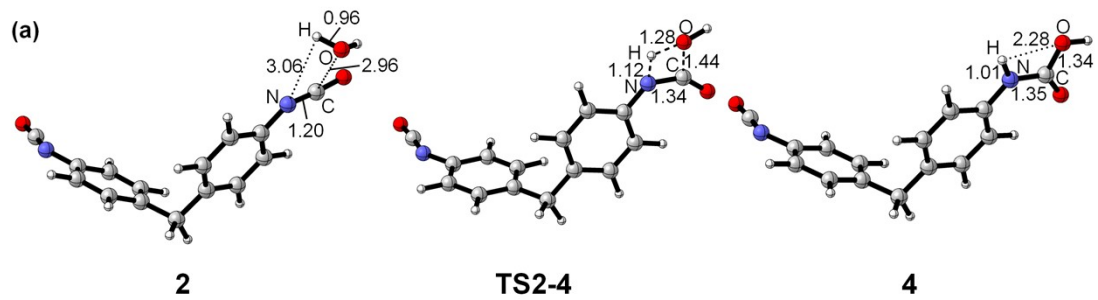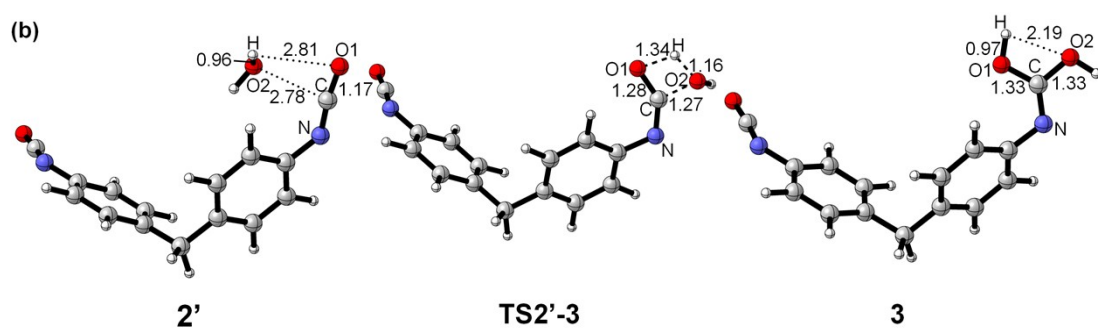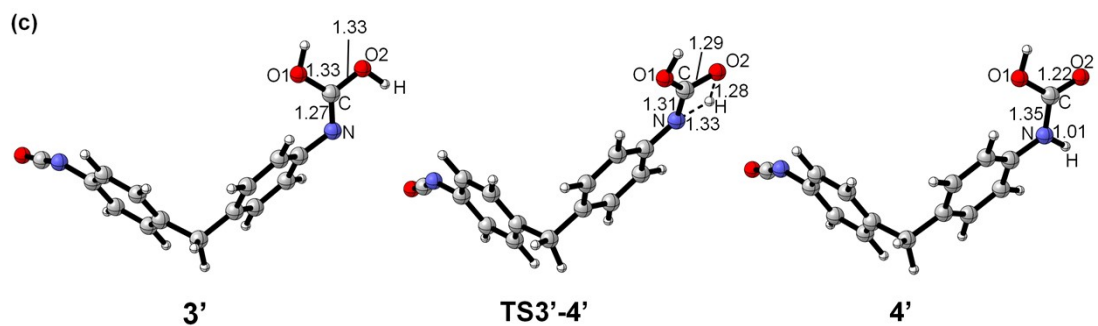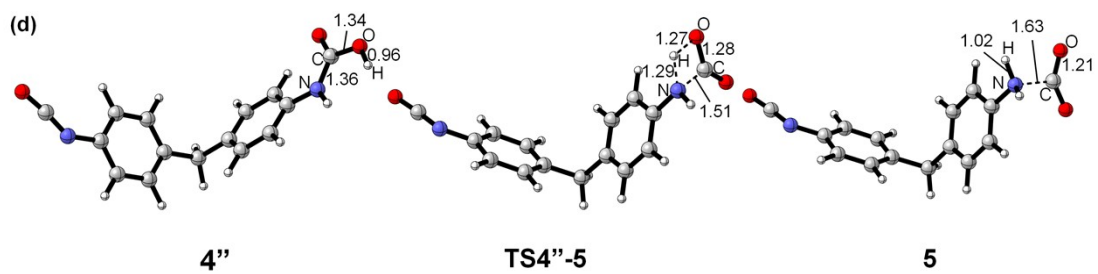

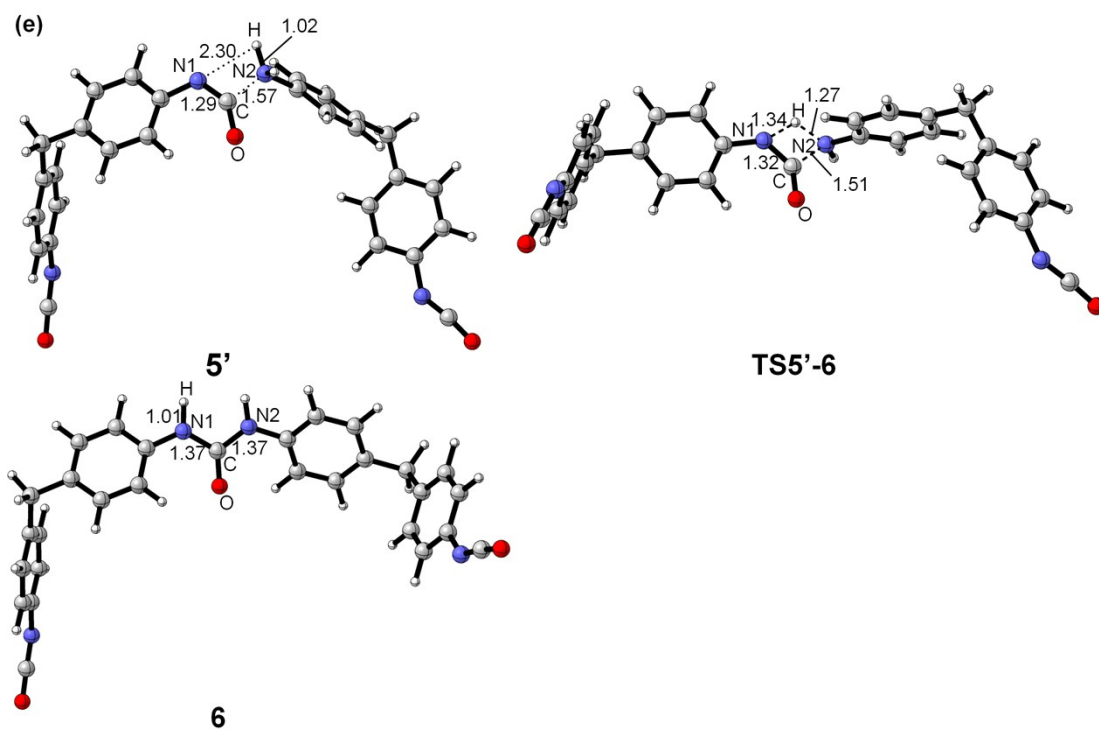

Fig. S2 Optimized structure for PUR moisture curing reaction without the involvement of additional water molecules. (a) breakage of C=N bond; (b) breakage of C=O bond; (c) H-transfer; (d) carbamic acid decomposition; (e) reaction of amine with isocyanate.

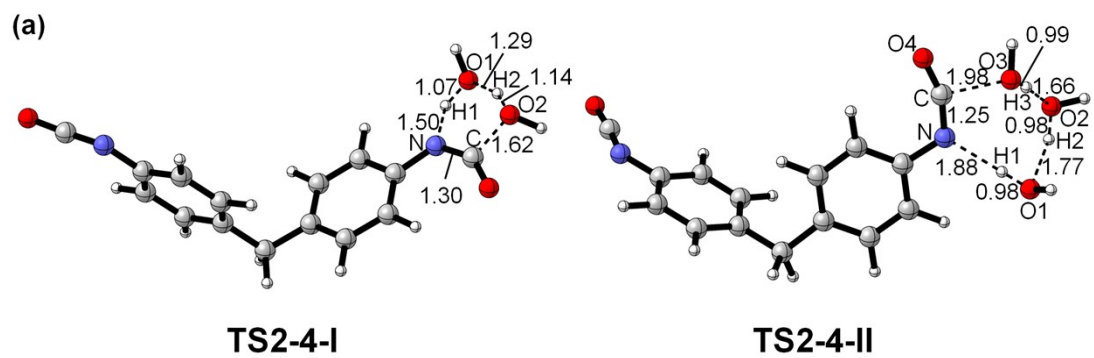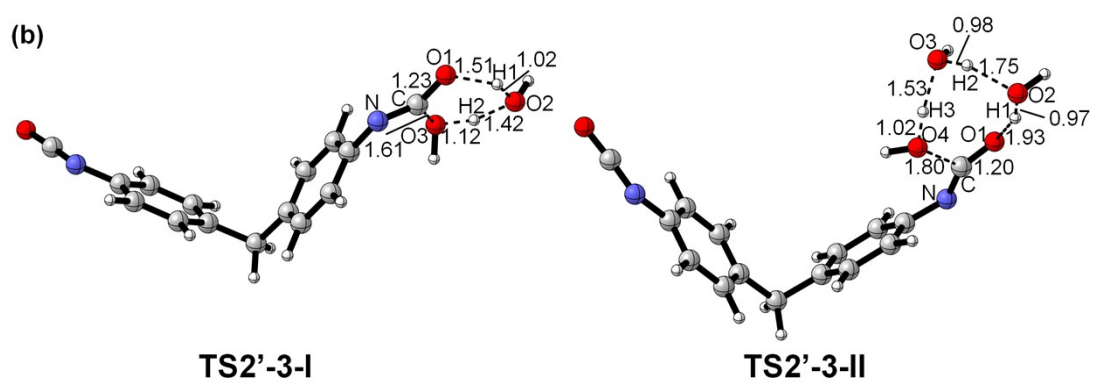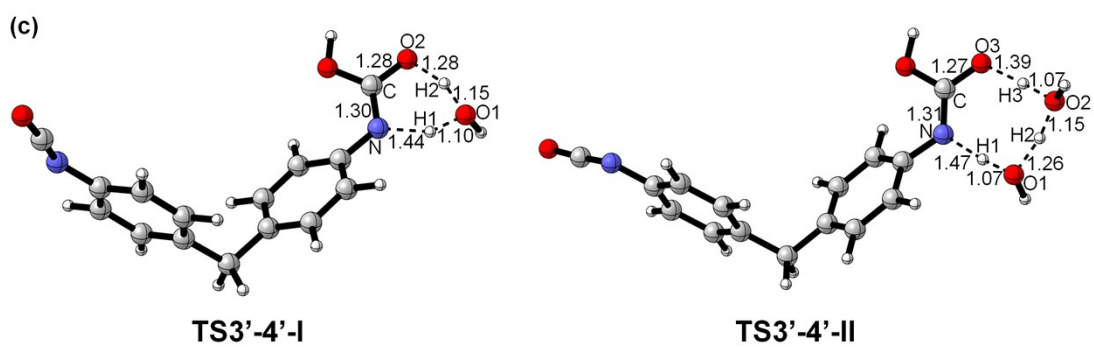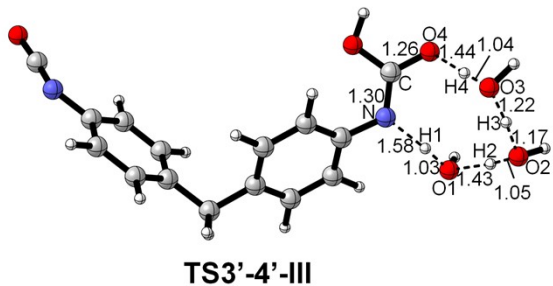

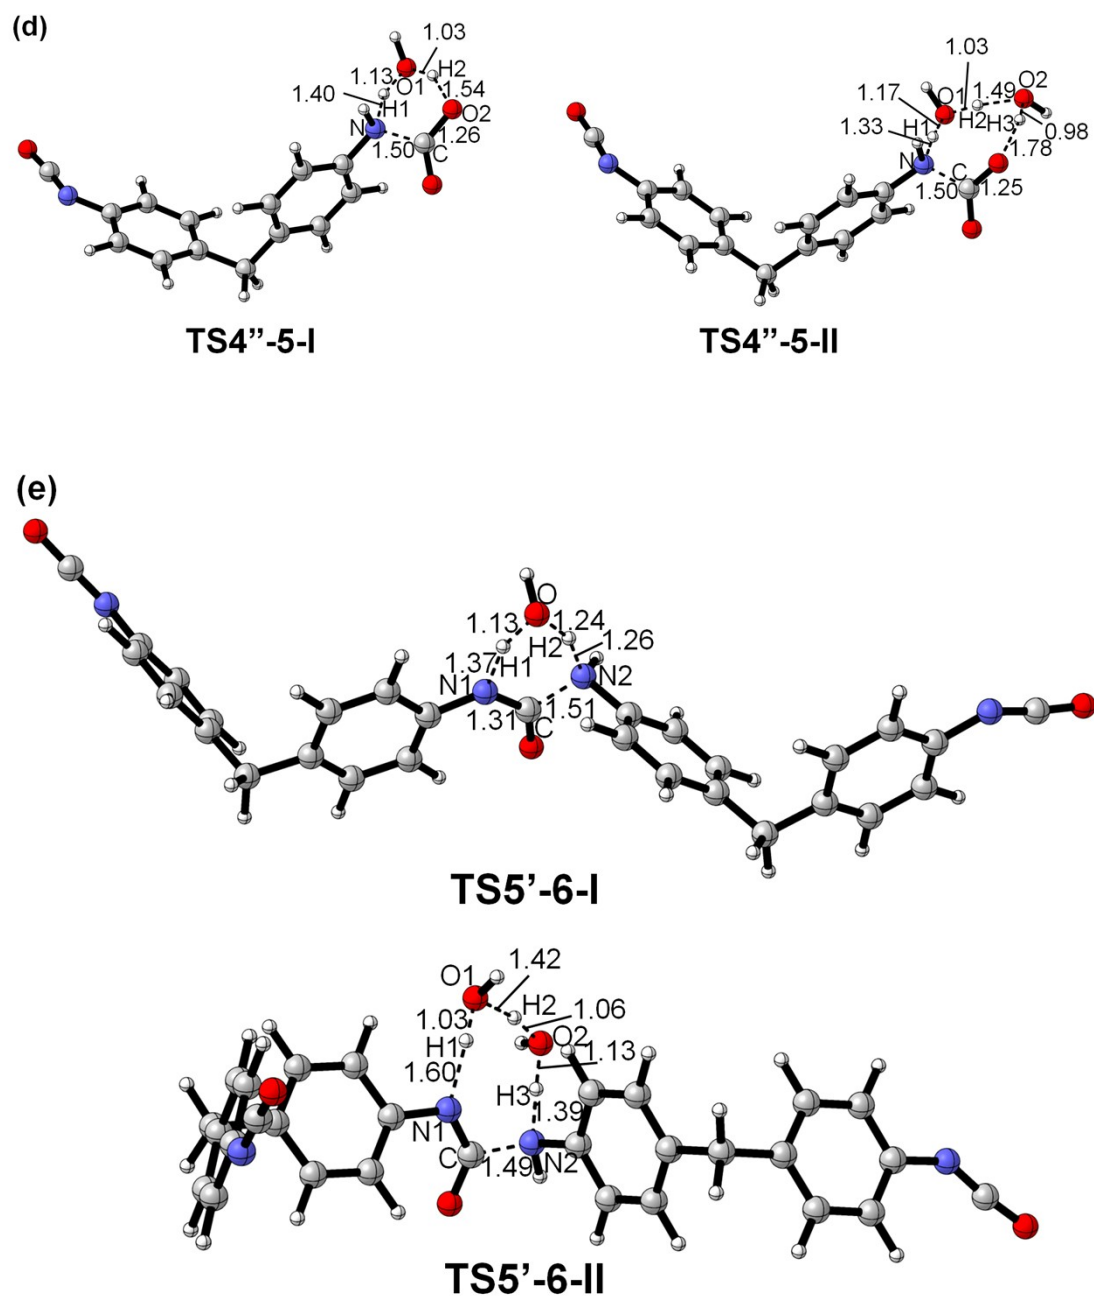

Fig. S3 Optimized structure for PUR moisture curing reaction with the involvement of additional water molecules. (a) breakage of C=N bond; (b) breakage of C=O bond; (c) H-transfer; (d) carbamic acid decomposition; (e) reaction of amine with isocyanate. \* The Greek numbers indicate the number of additional water molecules involved in the reaction

## 2p-I

Geometry with 35 atoms:

Total energy: -990.048750652

|   |           |           |           |
|---|-----------|-----------|-----------|
| N | -3.769037 | -1.494557 | 0.042576  |
| C | -4.905072 | -1.591500 | -0.340717 |
| O | -5.300758 | 0.362461  | 2.103231  |
| H | -5.943815 | -0.359100 | 2.132460  |
| O | -6.017149 | -1.840094 | -0.634719 |
| H | -5.440569 | 0.949809  | 0.369168  |
| H | -4.446826 | -0.085963 | 2.172162  |
| O | -5.525121 | 1.149560  | -0.583640 |
| H | -6.332239 | 0.686257  | -0.840393 |
| C | -2.680563 | -0.612768 | -0.032934 |
| C | -2.458199 | 0.167139  | -1.167396 |
| C | -1.797232 | -0.557576 | 1.046667  |
| C | -1.355528 | 1.015102  | -1.205208 |
| H | -3.151203 | 0.111798  | -2.000571 |
| C | -0.703001 | 0.296162  | 0.992790  |
| H | -1.981167 | -1.179486 | 1.916928  |
| C | -0.467559 | 1.094624  | -0.130813 |
| H | -1.183047 | 1.625997  | -2.087011 |
| H | -0.016246 | 0.340865  | 1.834361  |
| C | 0.743765  | 1.999554  | -0.183364 |
| H | 0.675875  | 2.633222  | -1.073953 |
| H | 0.748480  | 2.662444  | 0.687865  |
| C | 2.041849  | 1.220117  | -0.214735 |
| C | 3.010362  | 1.388632  | 0.776607  |
| C | 2.288779  | 0.302888  | -1.241420 |
| C | 4.200427  | 0.668255  | 0.748913  |
| H | 2.834444  | 2.095719  | 1.582375  |
| C | 3.471229  | -0.423616 | -1.284624 |
| H | 1.540838  | 0.153932  | -2.016176 |
| C | 4.427207  | -0.239697 | -0.285085 |
| H | 4.951539  | 0.803203  | 1.521300  |
| H | 3.662254  | -1.134304 | -2.081401 |
| N | 5.611813  | -0.989923 | -0.349918 |
| C | 6.627704  | -1.128792 | 0.281574  |
| O | 7.657684  | -1.359948 | 0.799222  |

## 2p-II

Geometry with 38 atoms:

Total energy: -1066.460508810

|   |           |          |           |
|---|-----------|----------|-----------|
| N | -4.250041 | 0.072035 | -0.156671 |
| C | -4.790810 | 0.855038 | 0.586726  |

|   |           |           |           |
|---|-----------|-----------|-----------|
| O | -0.283421 | 1.310196  | -0.452331 |
| H | -0.201450 | 0.354616  | -0.324529 |
| O | -5.428507 | 1.616144  | 1.212202  |
| H | -1.520212 | 1.895503  | 0.844386  |
| H | -2.829160 | 2.387981  | -0.715572 |
| O | -2.331229 | 2.348759  | 1.148419  |
| H | -2.635377 | 1.841030  | 1.911019  |
| H | -1.021233 | 1.416709  | -1.083517 |
| O | -2.647441 | 2.233680  | -1.660109 |
| H | -3.328330 | 1.604172  | -1.930677 |
| C | -3.054381 | -0.665665 | -0.153009 |
| C | -2.373562 | -0.936483 | 1.037887  |
| C | -2.566260 | -1.140208 | -1.367684 |
| C | -1.190139 | -1.661385 | 0.996262  |
| H | -2.772277 | -0.572992 | 1.980761  |
| C | -1.378351 | -1.866452 | -1.393162 |
| H | -3.110525 | -0.926913 | -2.282016 |
| C | -0.674394 | -2.135255 | -0.217411 |
| H | -0.651557 | -1.860708 | 1.919347  |
| H | -0.992447 | -2.227353 | -2.342272 |
| C | 0.659095  | -2.849603 | -0.249729 |
| H | 0.771931  | -3.358116 | -1.212336 |
| H | 0.696829  | -3.608648 | 0.537330  |
| C | 1.796668  | -1.868405 | -0.051921 |
| C | 2.040871  | -0.878971 | -1.012310 |
| C | 2.586480  | -1.892269 | 1.097760  |
| C | 3.040019  | 0.066556  | -0.830961 |
| H | 1.428595  | -0.842198 | -1.910616 |
| C | 3.596835  | -0.953694 | 1.292823  |
| H | 2.411180  | -2.652998 | 1.853086  |
| C | 3.818372  | 0.026709  | 0.329750  |
| H | 3.221935  | 0.835191  | -1.575933 |
| H | 4.209848  | -0.971814 | 2.187324  |
| N | 4.834645  | 0.967302  | 0.555753  |
| C | 5.306400  | 1.936529  | 0.019315  |
| O | 5.856716  | 2.890288  | -0.392604 |

2-I

Geometry with 35 atoms:

|               |                |           |           |
|---------------|----------------|-----------|-----------|
| Total energy: | -990.044539507 |           |           |
| N             | -4.022527      | -0.026822 | -0.039016 |
| C             | -4.926462      | -0.033816 | -0.837508 |
| O             | -5.872447      | 0.031738  | -1.529052 |
| H             | -4.465771      | 1.423364  | 1.572195  |



|   |           |           |           |
|---|-----------|-----------|-----------|
| O | -5.341508 | 2.925424  | -0.791239 |
| H | -6.166680 | 2.428907  | -0.849528 |
| H | -5.077903 | 2.829449  | 0.141130  |
| O | -4.356300 | 2.349494  | 1.834715  |
| H | -3.438258 | 2.538920  | 1.595870  |
| C | -2.769015 | -0.644085 | 0.123160  |
| C | -2.308838 | -1.601332 | -0.780918 |
| C | -1.993691 | -0.278706 | 1.223617  |
| H | -2.921955 | -1.878418 | -1.633058 |
| C | -1.066685 | -2.191849 | -0.573379 |
| C | -0.754197 | -0.876469 | 1.413524  |
| H | -2.368718 | 0.463375  | 1.920846  |
| C | -0.275250 | -1.841470 | 0.522946  |
| H | -0.708575 | -2.940878 | -1.274212 |
| H | -0.148530 | -0.590477 | 2.269610  |
| C | 1.094358  | -2.454665 | 0.723297  |
| H | 1.226967  | -2.722592 | 1.775887  |
| H | 1.166043  | -3.372846 | 0.132396  |
| C | 2.192732  | -1.497308 | 0.311737  |
| C | 2.941804  | -0.807179 | 1.267315  |
| C | 2.447063  | -1.254206 | -1.041341 |
| C | 3.924341  | 0.101884  | 0.890064  |
| H | 2.757218  | -0.985428 | 2.323171  |
| C | 3.425916  | -0.350798 | -1.435206 |
| H | 1.870082  | -1.780551 | -1.797550 |
| C | 4.164274  | 0.327706  | -0.465627 |
| H | 4.505683  | 0.634871  | 1.636444  |
| H | 3.626357  | -0.164980 | -2.484856 |
| N | 5.148085  | 1.234359  | -0.890594 |
| C | 5.968479  | 1.970963  | -0.406742 |
| O | 6.804776  | 2.724906  | -0.068261 |

## 2-II

Geometry with 38 atoms:

Total energy: -1066.460985050

|   |           |           |           |
|---|-----------|-----------|-----------|
| N | -3.998070 | -0.576652 | 0.148684  |
| C | -4.733351 | 0.061870  | -0.552975 |
| O | -5.567850 | 0.661920  | -1.129939 |
| H | -3.394929 | 2.219316  | 1.360572  |
| O | -4.686187 | 3.112248  | 0.294437  |
| H | -5.493139 | 2.596708  | 0.166309  |
| O | -2.537590 | 1.790947  | 1.549705  |
| H | -2.388679 | 1.730786  | -0.346730 |
| H | -1.961608 | 2.524368  | 1.802299  |

|   |           |           |           |
|---|-----------|-----------|-----------|
| O | -2.718272 | 1.870133  | -1.256667 |
| H | -4.120477 | 2.845601  | -0.456183 |
| H | -2.077330 | 2.468370  | -1.662219 |
| C | -2.710835 | -1.128956 | 0.164356  |
| C | -2.198182 | -1.581169 | 1.376886  |
| C | -1.955834 | -1.234745 | -1.007941 |
| C | -0.921605 | -2.135175 | 1.417021  |
| H | -2.797072 | -1.490809 | 2.276710  |
| C | -0.684416 | -1.787122 | -0.949325 |
| H | -2.368233 | -0.875445 | -1.945029 |
| C | -0.149741 | -2.245909 | 0.260169  |
| H | -0.521253 | -2.487422 | 2.363523  |
| H | -0.091841 | -1.860967 | -1.857967 |
| C | 1.254953  | -2.807015 | 0.304595  |
| H | 1.419466  | -3.284081 | 1.276032  |
| H | 1.371495  | -3.575907 | -0.465552 |
| C | 2.294378  | -1.728054 | 0.084986  |
| C | 2.461355  | -0.708998 | 1.030610  |
| C | 3.082718  | -1.706363 | -1.065322 |
| C | 3.393354  | 0.300402  | 0.839566  |
| H | 1.849367  | -0.707653 | 1.929334  |
| C | 4.022106  | -0.699137 | -1.273721 |
| H | 2.964134  | -2.487902 | -1.810365 |
| C | 4.175506  | 0.302457  | -0.320046 |
| H | 3.523574  | 1.086680  | 1.576972  |
| H | 4.635312  | -0.684882 | -2.168174 |
| N | 5.128760  | 1.306463  | -0.550839 |
| C | 5.547469  | 2.295699  | -0.006582 |
| O | 6.043540  | 3.275733  | 0.412699  |

3p-I

Geometry with 35 atoms:

|               |                |           |           |
|---------------|----------------|-----------|-----------|
| Total energy: | -990.070845667 |           |           |
| N             | -4.048360      | 0.242901  | -0.074572 |
| C             | -4.128950      | 1.481876  | 0.237420  |
| O             | -5.281816      | 2.136479  | 0.280890  |
| H             | -6.018503      | 1.496705  | 0.033714  |
| O             | -3.076128      | 2.256466  | 0.524410  |
| H             | -3.386751      | 3.159313  | 0.698404  |
| O             | -6.862239      | 0.200241  | -0.436344 |
| H             | -6.012701      | -0.280675 | -0.463768 |
| H             | -7.311739      | -0.145695 | 0.347029  |
| C             | -2.790684      | -0.401347 | -0.064325 |
| C             | -2.414528      | -1.158214 | -1.175933 |

|   |           |           |           |
|---|-----------|-----------|-----------|
| C | -1.942411 | -0.379759 | 1.052549  |
| C | -1.206303 | -1.851859 | -1.185174 |
| H | -3.074168 | -1.191993 | -2.037513 |
| C | -0.741974 | -1.077013 | 1.035768  |
| H | -2.233989 | 0.186035  | 1.932047  |
| C | -0.352860 | -1.823372 | -0.082413 |
| H | -0.926108 | -2.428127 | -2.063174 |
| H | -0.091272 | -1.044879 | 1.906939  |
| C | 0.972310  | -2.555266 | -0.088300 |
| H | 1.052135  | -3.139765 | -1.011233 |
| H | 1.013007  | -3.261725 | 0.747553  |
| C | 2.147936  | -1.607150 | 0.015756  |
| C | 2.351469  | -0.628867 | -0.965700 |
| C | 3.034743  | -1.666022 | 1.090296  |
| C | 3.411319  | 0.261675  | -0.882592 |
| H | 1.663562  | -0.563868 | -1.805239 |
| C | 4.103407  | -0.777993 | 1.190745  |
| H | 2.890777  | -2.416363 | 1.862467  |
| C | 4.288599  | 0.185216  | 0.203995  |
| H | 3.566188  | 1.017602  | -1.646530 |
| H | 4.790226  | -0.824252 | 2.028908  |
| N | 5.369129  | 1.072894  | 0.328327  |
| C | 5.838757  | 2.008820  | -0.266324 |
| O | 6.396307  | 2.927162  | -0.744019 |

### 3p-II

Geometry with 38 atoms:

Total energy: -1066.480690570

|   |           |           |           |
|---|-----------|-----------|-----------|
| N | -3.747449 | 0.346838  | 0.079536  |
| C | -3.904421 | 1.621587  | 0.098559  |
| O | -5.078623 | 2.209554  | 0.060986  |
| O | -2.881717 | 2.484921  | 0.133606  |
| H | -3.235251 | 3.388874  | 0.119997  |
| O | -5.657787 | -1.495695 | -0.645117 |
| H | -4.939364 | -0.862039 | -0.376864 |
| H | -6.730785 | -0.211240 | -0.279296 |
| O | -7.090145 | 0.677618  | -0.032295 |
| H | -5.863905 | 1.540841  | 0.027945  |
| H | -7.583796 | 0.974861  | -0.809138 |
| H | -5.721645 | -2.111808 | 0.096783  |
| C | -2.462817 | -0.235432 | 0.167132  |
| C | -1.496941 | 0.162221  | 1.103373  |
| C | -2.184997 | -1.327811 | -0.658895 |
| C | -0.280773 | -0.503866 | 1.180154  |

|   |           |           |           |
|---|-----------|-----------|-----------|
| H | -1.708472 | 0.988474  | 1.773806  |
| C | -0.961088 | -1.986979 | -0.575591 |
| H | -2.940475 | -1.656500 | -1.366683 |
| C | 0.008555  | -1.587884 | 0.343917  |
| H | 0.460029  | -0.180759 | 1.908353  |
| H | -0.760841 | -2.830481 | -1.231291 |
| C | 1.338955  | -2.302223 | 0.445785  |
| H | 1.342826  | -3.145303 | -0.253774 |
| H | 1.459586  | -2.720209 | 1.450884  |
| C | 2.516439  | -1.397969 | 0.151362  |
| C | 3.523105  | -1.193783 | 1.097004  |
| C | 2.614607  | -0.742483 | -1.080458 |
| C | 4.608216  | -0.366043 | 0.826262  |
| H | 3.459887  | -1.691117 | 2.060917  |
| C | 3.691525  | 0.085485  | -1.368168 |
| H | 1.834293  | -0.883068 | -1.824115 |
| C | 4.690018  | 0.271518  | -0.411291 |
| H | 5.388122  | -0.211214 | 1.565638  |
| H | 3.769983  | 0.589870  | -2.325263 |
| N | 5.768435  | 1.112237  | -0.729195 |
| C | 6.783978  | 1.509613  | -0.218712 |
| O | 7.797866  | 1.970049  | 0.158708  |

### 3p-III

Geometry with 41 atoms:

Total energy: -1142.877435970

|   |           |           |           |
|---|-----------|-----------|-----------|
| N | -3.261815 | 0.298707  | 0.259403  |
| C | -3.361396 | 1.577689  | 0.186921  |
| O | -4.501471 | 2.219599  | 0.298099  |
| O | -2.315295 | 2.382078  | -0.048426 |
| H | -2.624343 | 3.302011  | -0.042402 |
| O | -5.106606 | -1.164909 | -1.267273 |
| H | -4.556244 | -0.629609 | -0.644960 |
| H | -6.725924 | -0.606475 | -1.101079 |
| O | -7.585780 | -0.201259 | -0.832682 |
| H | -6.884293 | 0.454808  | 0.533525  |
| O | -6.324348 | 0.809980  | 1.275450  |
| H | -5.253253 | 1.602089  | 0.666461  |
| H | -6.894755 | 1.421386  | 1.761125  |
| H | -7.690044 | 0.556365  | -1.422986 |
| H | -4.820284 | -0.864352 | -2.140170 |
| C | -1.988404 | -0.313942 | 0.210166  |
| C | -1.794814 | -1.394733 | -0.654013 |
| C | -0.937925 | 0.063671  | 1.057779  |

|   |           |           |           |
|---|-----------|-----------|-----------|
| C | -0.572761 | -2.061079 | -0.690163 |
| H | -2.612472 | -1.708171 | -1.295812 |
| C | 0.275933  | -0.610630 | 1.017703  |
| H | -1.082585 | 0.885127  | 1.752573  |
| C | 0.480616  | -1.683169 | 0.143074  |
| H | -0.438730 | -2.893054 | -1.376756 |
| H | 1.079683  | -0.299913 | 1.681154  |
| C | 1.794508  | -2.439513 | 0.128968  |
| H | 1.842222  | -3.104707 | 0.998802  |
| H | 1.820034  | -3.079328 | -0.759613 |
| C | 3.006716  | -1.537012 | 0.141452  |
| C | 3.265633  | -0.683524 | -0.938276 |
| C | 3.878662  | -1.515994 | 1.229633  |
| C | 4.367779  | 0.158907  | -0.938465 |
| H | 2.592114  | -0.681395 | -1.791550 |
| C | 4.988796  | -0.674664 | 1.247567  |
| H | 3.689358  | -2.167766 | 2.077898  |
| C | 5.231760  | 0.160043  | 0.161526  |
| H | 4.568569  | 0.815620  | -1.779744 |
| H | 5.664911  | -0.660601 | 2.095529  |
| N | 6.357811  | 0.997307  | 0.198209  |
| C | 6.895495  | 1.817258  | -0.500775 |
| O | 7.517309  | 2.630266  | -1.079400 |

3-I

Geometry with 35 atoms:

|               |          |           |                |
|---------------|----------|-----------|----------------|
| Total energy: |          |           | -990.061513569 |
| N             | 3.601493 | 1.057801  | 0.957856       |
| C             | 4.650669 | 0.926306  | 0.240182       |
| O             | 5.698784 | 1.757358  | 0.399613       |
| H             | 5.468684 | 2.397281  | 1.091438       |
| O             | 4.868045 | 0.006821  | -0.682959      |
| H             | 5.798198 | 0.105958  | -1.073026      |
| H             | 7.481984 | 1.168654  | -1.261423      |
| O             | 7.239297 | 0.312948  | -1.644207      |
| H             | 7.817784 | -0.321416 | -1.197912      |
| C             | 2.505130 | 0.198394  | 0.735236       |
| C             | 1.947492 | -0.008956 | -0.535499      |
| C             | 1.893979 | -0.407737 | 1.836475       |
| C             | 0.828206 | -0.816430 | -0.690844      |
| H             | 2.398413 | 0.470816  | -1.398577      |
| C             | 0.776407 | -1.222126 | 1.671103       |
| H             | 2.310365 | -0.240506 | 2.825211       |
| C             | 0.228891 | -1.442695 | 0.406878       |

|   |           |           |           |
|---|-----------|-----------|-----------|
| H | 0.407111  | -0.963064 | -1.683223 |
| H | 0.323538  | -1.694745 | 2.539230  |
| C | -1.009442 | -2.294858 | 0.222588  |
| H | -0.863588 | -2.982598 | -0.616475 |
| H | -1.167179 | -2.897756 | 1.122521  |
| C | -2.236856 | -1.448521 | -0.037877 |
| C | -2.847475 | -0.754008 | 1.012780  |
| C | -2.759778 | -1.307155 | -1.323905 |
| C | -3.952935 | 0.054779  | 0.791845  |
| H | -2.448712 | -0.851209 | 2.019521  |
| C | -3.866524 | -0.496986 | -1.563929 |
| H | -2.298245 | -1.839928 | -2.150738 |
| C | -4.461467 | 0.181720  | -0.504272 |
| H | -4.429092 | 0.587006  | 1.609832  |
| H | -4.274307 | -0.388993 | -2.563214 |
| N | -5.578922 | 0.989016  | -0.769635 |
| C | -6.344280 | 1.699751  | -0.170867 |
| O | -7.155508 | 2.417112  | 0.287543  |

### 3-II

Geometry with 38 atoms:

|               |                 |           |           |
|---------------|-----------------|-----------|-----------|
| Total energy: | -1066.461848500 |           |           |
| N             | -3.748389       | -1.154103 | -0.502977 |
| C             | -4.138059       | -0.031132 | -0.033486 |
| O             | -3.376262       | 0.914124  | 0.567713  |
| H             | -2.450236       | 0.620579  | 0.608082  |
| O             | -5.401291       | 0.332740  | -0.126143 |
| H             | -5.569337       | 1.249528  | 0.291836  |
| H             | -5.153893       | 3.150730  | 0.388454  |
| O             | -5.845610       | 2.642018  | 0.872597  |
| H             | -6.686345       | 2.940286  | 0.499331  |
| H             | -3.366543       | 2.672256  | -0.382544 |
| O             | -3.733841       | 3.553418  | -0.561188 |
| H             | -4.052202       | 3.496216  | -1.471932 |
| C             | -2.400041       | -1.535500 | -0.345522 |
| C             | -1.796040       | -1.639550 | 0.916763  |
| C             | -1.655002       | -1.898736 | -1.473254 |
| C             | -0.477037       | -2.067833 | 1.036369  |
| H             | -2.373849       | -1.397838 | 1.805434  |
| C             | -0.338960       | -2.328354 | -1.343071 |
| H             | -2.120826       | -1.838115 | -2.451915 |
| C             | 0.271223        | -2.417829 | -0.089025 |
| H             | -0.025041       | -2.140112 | 2.022896  |
| H             | 0.224141        | -2.604758 | -2.231054 |

|   |          |           |           |
|---|----------|-----------|-----------|
| C | 1.720584 | -2.835087 | 0.047017  |
| H | 2.008057 | -3.432105 | -0.823884 |
| H | 1.842128 | -3.459371 | 0.937393  |
| C | 2.629096 | -1.629016 | 0.156146  |
| C | 2.985092 | -0.905148 | -0.987323 |
| C | 3.084672 | -1.182879 | 1.397683  |
| C | 3.776729 | 0.231528  | -0.898899 |
| H | 2.636801 | -1.239221 | -1.961376 |
| C | 3.877855 | -0.044059 | 1.504488  |
| H | 2.818850 | -1.735094 | 2.294909  |
| C | 4.221249 | 0.661843  | 0.354526  |
| H | 4.054924 | 0.789048  | -1.788214 |
| H | 4.234133 | 0.301203  | 2.468988  |
| N | 5.022091 | 1.807496  | 0.486391  |
| C | 5.508453 | 2.655176  | -0.216817 |
| O | 6.037559 | 3.539260  | -0.783464 |

4pp-I

Geometry with 35 atoms:

|               |                |           |           |
|---------------|----------------|-----------|-----------|
| Total energy: | -990.074520440 |           |           |
| N             | -3.941035      | 0.547432  | -0.029673 |
| C             | -5.151858      | 0.111094  | -0.488949 |
| O             | -5.347123      | -0.977882 | -1.011288 |
| O             | -6.156228      | 0.977994  | -0.339842 |
| O             | -5.397326      | 3.165343  | 0.885306  |
| H             | -5.874446      | 1.824169  | 0.112431  |
| H             | -4.675288      | 3.635828  | 0.445904  |
| H             | -3.933837      | 1.419667  | 0.487406  |
| H             | -5.073951      | 2.988317  | 1.779645  |
| C             | -2.745669      | -0.199903 | 0.010124  |
| C             | -2.466533      | -1.248726 | -0.867928 |
| C             | -1.784124      | 0.176250  | 0.956072  |
| C             | -1.249235      | -1.920514 | -0.769383 |
| H             | -3.186169      | -1.535013 | -1.621952 |
| C             | -0.573380      | -0.496269 | 1.031634  |
| H             | -1.997081      | 0.999539  | 1.632541  |
| C             | -0.289264      | -1.566765 | 0.176880  |
| H             | -1.044637      | -2.738761 | -1.454875 |
| H             | 0.162389       | -0.188221 | 1.770661  |
| C             | 1.017087       | -2.324749 | 0.289428  |
| H             | 1.025869       | -2.904150 | 1.219306  |
| H             | 1.077581       | -3.044481 | -0.533931 |
| C             | 2.233209       | -1.426619 | 0.265739  |
| C             | 2.521985       | -0.656342 | -0.867729 |

|   |          |           |           |
|---|----------|-----------|-----------|
| C | 3.085361 | -1.337783 | 1.365898  |
| C | 3.636275 | 0.168940  | -0.908758 |
| H | 1.862623 | -0.707010 | -1.730699 |
| C | 4.207515 | -0.512649 | 1.342937  |
| H | 2.872213 | -1.924491 | 2.254988  |
| C | 4.482476 | 0.236240  | 0.203081  |
| H | 3.861457 | 0.759906  | -1.791596 |
| H | 4.870591 | -0.447551 | 2.198842  |
| N | 5.622526 | 1.054724  | 0.198940  |
| C | 6.194258 | 1.806255  | -0.547864 |
| O | 6.847381 | 2.559095  | -1.171755 |

#### 4pp-II

Geometry with 38 atoms:

Total energy: -1066.488423760

|   |           |           |           |
|---|-----------|-----------|-----------|
| N | -3.846602 | 0.010176  | 0.431434  |
| C | -4.930452 | -0.012191 | -0.403114 |
| O | -5.111644 | -0.837710 | -1.288007 |
| O | -5.834113 | 0.942017  | -0.167234 |
| O | -2.644327 | 2.776368  | -0.600835 |
| H | -3.894046 | 2.932192  | 0.614175  |
| H | -3.048812 | 2.185485  | -1.251564 |
| H | -3.835556 | 0.742316  | 1.133249  |
| O | -4.615504 | 2.732845  | 1.256578  |
| H | -5.463674 | 1.671901  | 0.421543  |
| H | -1.938856 | 2.243302  | -0.208118 |
| H | -5.121812 | 3.549312  | 1.359574  |
| C | -2.622580 | -0.665654 | 0.262698  |
| C | -2.411181 | -1.699155 | -0.653392 |
| C | -1.562790 | -0.254214 | 1.083409  |
| C | -1.150344 | -2.286943 | -0.743205 |
| H | -3.213670 | -2.036678 | -1.292350 |
| C | -0.317825 | -0.857607 | 0.983670  |
| H | -1.726025 | 0.548137  | 1.798757  |
| C | -0.087728 | -1.887641 | 0.065691  |
| H | -0.997419 | -3.083654 | -1.466471 |
| H | 0.489262  | -0.517582 | 1.627528  |
| C | 1.262088  | -2.570654 | -0.027408 |
| H | 1.303751  | -3.133553 | -0.966176 |
| H | 1.358196  | -3.302754 | 0.782726  |
| C | 2.428538  | -1.612437 | 0.043772  |
| C | 2.607650  | -0.638121 | -0.946658 |
| C | 3.337425  | -1.660989 | 1.100221  |
| C | 3.666889  | 0.255681  | -0.890391 |



|   |          |           |           |
|---|----------|-----------|-----------|
| H | 1.904861 | -0.580663 | -1.774089 |
| C | 4.405783 | -0.770231 | 1.173637  |
| H | 3.211084 | -2.407174 | 1.879403  |
| C | 4.568067 | 0.186900  | 0.177061  |
| H | 3.804585 | 1.006885  | -1.662325 |
| H | 5.110613 | -0.810760 | 1.997017  |
| N | 5.650756 | 1.075682  | 0.270842  |
| C | 6.109067 | 2.002627  | -0.346628 |
| O | 6.657189 | 2.913485  | -0.848626 |

4p-I

Geometry with 35 atoms:

|               |                |           |           |
|---------------|----------------|-----------|-----------|
| Total energy: | -990.091286453 |           |           |
| N             | -4.056503      | 0.323390  | 0.038737  |
| C             | -4.353357      | 1.605665  | 0.347468  |
| O             | -5.481382      | 2.082380  | 0.221644  |
| H             | -6.611938      | 0.758784  | -0.659747 |
| O             | -3.319428      | 2.323703  | 0.800482  |
| H             | -3.648303      | 3.219764  | 0.980197  |
| O             | -6.752249      | -0.118479 | -1.057107 |
| H             | -4.820883      | -0.156290 | -0.436468 |
| H             | -7.138749      | -0.635070 | -0.338317 |
| C             | -2.794323      | -0.317832 | 0.056011  |
| C             | -2.519192      | -1.233419 | -0.959558 |
| C             | -1.859671      | -0.116487 | 1.076154  |
| C             | -1.314533      | -1.930398 | -0.964891 |
| H             | -3.251027      | -1.392973 | -1.746002 |
| C             | -0.655001      | -0.807599 | 1.047777  |
| H             | -2.076608      | 0.567951  | 1.887001  |
| C             | -0.363227      | -1.726189 | 0.034427  |
| H             | -1.112732      | -2.640781 | -1.761829 |
| H             | 0.071661       | -0.639034 | 1.838981  |
| C             | 0.950112       | -2.480989 | 0.038277  |
| H             | 0.999443       | -3.108648 | -0.857581 |
| H             | 0.984337       | -3.151231 | 0.904086  |
| C             | 2.149342       | -1.560727 | 0.085519  |
| C             | 2.420234       | -0.698307 | -0.983929 |
| C             | 2.992471       | -1.530073 | 1.196050  |
| C             | 3.505882       | 0.164563  | -0.951854 |
| H             | 1.768517       | -0.704568 | -1.854099 |
| C             | 4.085481       | -0.668110 | 1.246174  |
| H             | 2.794165       | -2.190133 | 2.035795  |
| C             | 4.340309       | 0.176902  | 0.170771  |
| H             | 3.715954       | 0.829014  | -1.784715 |

|   |          |           |           |
|---|----------|-----------|-----------|
| H | 4.739492 | -0.646116 | 2.111115  |
| N | 5.448342 | 1.035823  | 0.241623  |
| C | 5.986199 | 1.870345  | -0.439958 |
| O | 6.605489 | 2.698741  | -0.998965 |

#### 4p-II

Geometry with 38 atoms:

Total energy: -1066.498218490

|   |           |           |           |
|---|-----------|-----------|-----------|
| N | -3.688842 | 0.422256  | 0.071405  |
| C | -3.989184 | 1.734853  | 0.111431  |
| O | -5.134474 | 2.175862  | -0.006097 |
| O | -2.937819 | 2.546577  | 0.280428  |
| H | -3.276667 | 3.456582  | 0.294241  |
| O | -5.665271 | -1.541039 | -0.694719 |
| H | -4.459982 | -0.195229 | -0.209934 |
| H | -6.390513 | -0.905762 | -0.500268 |
| O | -7.374105 | 0.510619  | -0.127224 |
| H | -6.608343 | 1.115542  | -0.055790 |
| H | -7.765821 | 0.729299  | -0.982766 |
| H | -5.590107 | -2.071648 | 0.109007  |
| C | -2.416110 | -0.188511 | 0.181987  |
| C | -1.432997 | 0.265194  | 1.067627  |
| C | -2.179900 | -1.332327 | -0.581088 |
| C | -0.221315 | -0.408211 | 1.151686  |
| H | -1.619453 | 1.132008  | 1.689600  |
| C | -0.966428 | -2.005989 | -0.472337 |
| H | -2.949617 | -1.689089 | -1.258823 |
| C | 0.031817  | -1.553805 | 0.390093  |
| H | 0.541433  | -0.043436 | 1.835532  |
| H | -0.793623 | -2.895483 | -1.072116 |
| C | 1.355760  | -2.277300 | 0.509942  |
| H | 1.348106  | -3.143196 | -0.160878 |
| H | 1.474133  | -2.663304 | 1.528095  |
| C | 2.540532  | -1.393991 | 0.183802  |
| C | 3.552782  | -1.172261 | 1.119312  |
| C | 2.638899  | -0.774484 | -1.066535 |
| C | 4.643479  | -0.361246 | 0.821502  |
| H | 3.489080  | -1.641442 | 2.097155  |
| C | 3.721207  | 0.036686  | -1.381057 |
| H | 1.854756  | -0.929220 | -1.803275 |
| C | 4.724461  | 0.242046  | -0.433196 |
| H | 5.427821  | -0.192639 | 1.553107  |
| H | 3.800035  | 0.513941  | -2.351928 |
| N | 5.806387  | 1.067265  | -0.777677 |

|   |          |          |           |
|---|----------|----------|-----------|
| C | 6.819566 | 1.485079 | -0.279152 |
| O | 7.831735 | 1.960735 | 0.083715  |

#### 4p-III

Geometry with 41 atoms:

Total energy: -1142.895050810

|   |           |           |           |
|---|-----------|-----------|-----------|
| N | 3.190869  | 0.640806  | 0.102422  |
| C | 3.434296  | 1.926173  | -0.220092 |
| O | 4.532643  | 2.463671  | -0.057136 |
| O | 2.389103  | 2.589913  | -0.726585 |
| H | 2.687348  | 3.493042  | -0.922973 |
| O | 5.152739  | -0.603639 | 1.797488  |
| H | 3.933204  | 0.207557  | 0.666819  |
| H | 5.507208  | -1.127057 | 1.046388  |
| O | 6.049156  | -1.691421 | -0.565589 |
| H | 6.367518  | -0.769450 | -0.691747 |
| O | 6.831898  | 0.928323  | -0.507032 |
| H | 6.025142  | 1.426083  | -0.269537 |
| H | 7.354757  | 0.912529  | 0.305076  |
| H | 6.854214  | -2.200181 | -0.404785 |
| H | 5.748335  | 0.156154  | 1.849455  |
| C | 1.969083  | -0.068880 | 0.023853  |
| C | 1.702571  | -0.998663 | 1.029521  |
| C | 1.071956  | 0.074178  | -1.039148 |
| C | 0.541765  | -1.765057 | 0.983746  |
| H | 2.409340  | -1.116044 | 1.845416  |
| C | -0.090061 | -0.686829 | -1.061675 |
| H | 1.284139  | 0.768540  | -1.842786 |
| C | -0.374194 | -1.617911 | -0.057663 |
| H | 0.346540  | -2.484982 | 1.773775  |
| H | -0.789552 | -0.561858 | -1.884903 |
| C | -1.647346 | -2.437042 | -0.111742 |
| H | -1.636087 | -3.077131 | -1.000405 |
| H | -1.682477 | -3.095787 | 0.762183  |
| C | -2.886117 | -1.569526 | -0.148945 |
| C | -3.218903 | -0.769266 | 0.951070  |
| C | -3.702208 | -1.521653 | -1.278949 |
| C | -4.337078 | 0.051302  | 0.928804  |
| H | -2.588477 | -0.789223 | 1.836616  |
| C | -4.827476 | -0.701519 | -1.319350 |
| H | -3.456313 | -2.133550 | -2.142222 |
| C | -5.142312 | 0.083434  | -0.214515 |
| H | -4.594664 | 0.667569  | 1.784936  |
| H | -5.460500 | -0.665981 | -2.199329 |

|   |           |          |           |
|---|-----------|----------|-----------|
| N | -6.280303 | 0.902603 | -0.277373 |
| C | -6.859165 | 1.698254 | 0.416742  |
| O | -7.517101 | 2.488645 | 0.986698  |

4-I

Geometry with 35 atoms:

|               |                |           |           |
|---------------|----------------|-----------|-----------|
| Total energy: | -990.090070387 |           |           |
| N             | -3.944400      | 0.550309  | -0.089321 |
| C             | -5.015861      | 0.150210  | -0.810516 |
| O             | -5.161438      | -0.911798 | -1.397603 |
| H             | -4.038190      | 1.463449  | 0.363197  |
| O             | -5.966398      | 1.113711  | -0.808215 |
| H             | -6.718730      | 0.781572  | -1.323424 |
| H             | -5.145000      | 2.894562  | 1.795847  |
| O             | -4.777242      | 3.144355  | 0.937824  |
| H             | -5.496480      | 2.952881  | 0.318409  |
| C             | -2.763038      | -0.172206 | 0.157960  |
| C             | -2.434197      | -1.373982 | -0.472202 |
| C             | -1.871112      | 0.382478  | 1.086994  |
| H             | -3.104680      | -1.814100 | -1.196145 |
| C             | -1.230179      | -2.005003 | -0.160065 |
| C             | -0.677447      | -0.258310 | 1.380174  |
| H             | -2.125969      | 1.319768  | 1.574947  |
| C             | -0.337742      | -1.468064 | 0.764996  |
| H             | -0.985655      | -2.941451 | -0.654902 |
| H             | 0.005333       | 0.186787  | 2.100187  |
| C             | 0.981520       | -2.142314 | 1.076396  |
| H             | 1.093352       | -2.255689 | 2.159601  |
| H             | 0.981829       | -3.145272 | 0.637832  |
| C             | 2.155306       | -1.351647 | 0.539958  |
| C             | 3.008157       | -0.652777 | 1.396604  |
| C             | 2.383300       | -1.277181 | -0.837699 |
| C             | 4.065033       | 0.102619  | 0.899052  |
| H             | 2.845455       | -0.700286 | 2.469843  |
| C             | 3.435793       | -0.530673 | -1.351103 |
| H             | 1.724162       | -1.811948 | -1.517227 |
| C             | 4.275655       | 0.161421  | -0.478411 |
| H             | 4.726132       | 0.645116  | 1.568230  |
| H             | 3.615353       | -0.476134 | -2.419429 |
| N             | 5.330049       | 0.912160  | -1.022535 |
| C             | 6.219728       | 1.628375  | -0.641459 |
| O             | 7.124335       | 2.341956  | -0.406763 |

4-II

Geometry with 38 atoms:

Total energy: -1066.491730110

|   |           |           |           |
|---|-----------|-----------|-----------|
| N | -3.663418 | 0.256990  | -0.421151 |
| C | -3.929821 | 1.502741  | -0.864349 |
| O | -3.138408 | 2.318720  | -1.312630 |
| H | -4.445171 | -0.267928 | -0.006505 |
| O | -5.256645 | 1.770388  | -0.755618 |
| H | -5.399426 | 2.671204  | -1.089318 |
| O | -5.781576 | -1.256165 | 0.789381  |
| H | -6.126405 | -0.457973 | 1.244411  |
| H | -6.370110 | -1.371417 | 0.032184  |
| O | -6.493181 | 1.195566  | 1.815402  |
| H | -6.078923 | 1.588175  | 1.029520  |
| H | -7.440548 | 1.293187  | 1.652025  |
| C | -2.389608 | -0.340336 | -0.339172 |
| C | -2.246789 | -1.411553 | 0.547568  |
| C | -1.296930 | 0.058137  | -1.115607 |
| C | -1.026709 | -2.065890 | 0.664189  |
| H | -3.098078 | -1.722283 | 1.146126  |
| C | -0.081416 | -0.605465 | -0.980204 |
| H | -1.395869 | 0.873122  | -1.819396 |
| C | 0.077850  | -1.674515 | -0.095536 |
| H | -0.931293 | -2.892980 | 1.362527  |
| H | 0.762090  | -0.282825 | -1.585469 |
| C | 1.395065  | -2.416505 | 0.013938  |
| H | 1.391141  | -2.997908 | 0.942454  |
| H | 1.475883  | -3.138851 | -0.806652 |
| C | 2.605878  | -1.512732 | -0.014012 |
| C | 2.789746  | -0.542972 | 0.980013  |
| C | 3.555738  | -1.610851 | -1.030261 |
| C | 3.892804  | 0.297834  | 0.966783  |
| H | 2.054637  | -0.445432 | 1.774858  |
| C | 4.669256  | -0.774183 | -1.059502 |
| H | 3.426572  | -2.353598 | -1.812259 |
| C | 4.835886  | 0.178257  | -0.059244 |
| H | 4.032663  | 1.046394  | 1.740812  |
| H | 5.407052  | -0.854932 | -1.850402 |
| N | 5.965931  | 1.009897  | -0.105877 |
| C | 6.447741  | 1.907653  | 0.536512  |
| O | 7.023066  | 2.785004  | 1.066913  |

5p-I

Geometry with 61 atoms:

Total energy: -1638.824609610

|   |           |           |           |
|---|-----------|-----------|-----------|
| N | -0.860482 | 0.231985  | -0.560397 |
| C | -0.085626 | -0.349184 | -1.425865 |
| O | -0.073217 | -1.387144 | -2.087506 |
| N | 1.181980  | 0.527714  | -1.646466 |
| H | 1.016379  | 1.472898  | -1.250098 |
| H | 1.326141  | 0.602381  | -2.659283 |
| O | 0.223728  | 2.699936  | -0.030779 |
| H | -0.345828 | 1.890485  | -0.045068 |
| H | -0.234752 | 3.324817  | -0.607765 |
| C | -2.070793 | -0.356586 | -0.152197 |
| C | -2.547590 | -1.620719 | -0.527730 |
| C | -2.856857 | 0.412803  | 0.723921  |
| C | -3.770173 | -2.082585 | -0.039439 |
| H | -1.967745 | -2.242568 | -1.195865 |
| C | -4.070857 | -0.056483 | 1.199929  |
| H | -2.488880 | 1.391001  | 1.021875  |
| C | -4.549068 | -1.318469 | 0.827344  |
| H | -4.121389 | -3.066148 | -0.342174 |
| H | -4.662601 | 0.562922  | 1.870585  |
| C | 2.346232  | -0.089050 | -1.016931 |
| C | 3.102175  | -1.008274 | -1.729512 |
| C | 2.621596  | 0.218667  | 0.309728  |
| C | 4.178017  | -1.622469 | -1.094253 |
| H | 2.855661  | -1.235408 | -2.762081 |
| C | 3.700151  | -0.403773 | 0.927310  |
| H | 2.005716  | 0.938504  | 0.840717  |
| C | 4.487716  | -1.329047 | 0.235555  |
| H | 4.782880  | -2.340639 | -1.640302 |
| H | 3.933366  | -0.168469 | 1.962037  |
| C | -5.885960 | -1.812760 | 1.337025  |
| H | -6.017350 | -2.858102 | 1.037883  |
| H | -5.901299 | -1.782649 | 2.431568  |
| C | 5.695772  | -1.952213 | 0.903336  |
| H | 5.931754  | -2.901313 | 0.413809  |
| H | 5.465026  | -2.158925 | 1.952485  |
| C | -7.039815 | -0.987117 | 0.809423  |
| C | -7.832147 | -0.219827 | 1.665481  |
| C | -7.319179 | -0.962690 | -0.560935 |
| C | -8.882225 | 0.550557  | 1.175748  |
| H | -7.627694 | -0.225397 | 2.732547  |
| C | -8.364939 | -0.201892 | -1.066386 |
| H | -6.705471 | -1.549239 | -1.240177 |
| C | -9.146328 | 0.556191  | -0.193587 |
| H | -9.495953 | 1.146306  | 1.844636  |

|   |            |           |           |
|---|------------|-----------|-----------|
| H | -8.584451  | -0.186613 | -2.128525 |
| C | 6.891020   | -1.025949 | 0.823763  |
| C | 7.746883   | -1.060926 | -0.281225 |
| C | 7.126297   | -0.078649 | 1.822520  |
| C | 8.812011   | -0.176096 | -0.391263 |
| H | 7.578821   | -1.793153 | -1.066552 |
| C | 8.186763   | 0.816053  | 1.726489  |
| H | 6.473296   | -0.041290 | 2.690250  |
| C | 9.027539   | 0.766473  | 0.616835  |
| H | 9.477075   | -0.208283 | -1.249005 |
| H | 8.369153   | 1.550925  | 2.503021  |
| N | -10.196104 | 1.318715  | -0.729978 |
| N | 10.090004  | 1.680833  | 0.542673  |
| C | -11.056856 | 2.069887  | -0.350654 |
| C | 10.984491  | 1.963190  | -0.212689 |
| O | 11.894083  | 2.339313  | -0.855500 |
| O | -11.936987 | 2.814003  | -0.116939 |

#### 5p-II

Geometry with 64 atoms:

|               |                 |           |           |
|---------------|-----------------|-----------|-----------|
| Total energy: | -1715.234084520 |           |           |
| N             | 0.946280        | -2.653947 | 0.002682  |
| C             | 0.143146        | -2.714599 | -1.020444 |
| O             | 0.252203        | -2.620732 | -2.246264 |
| N             | -1.307361       | -2.944223 | -0.566832 |
| H             | -1.381632       | -3.538091 | 0.309730  |
| H             | -1.762606       | -3.447316 | -1.335256 |
| O             | -1.760336       | -4.334147 | 1.727101  |
| H             | -1.025770       | -3.938912 | 2.254112  |
| H             | -1.500041       | -5.255096 | 1.591390  |
| O             | 0.403259        | -3.065948 | 2.671763  |
| H             | 0.573251        | -2.857342 | 1.710745  |
| H             | 0.234698        | -2.210819 | 3.088691  |
| C             | 2.317509        | -2.387501 | -0.197066 |
| C             | 2.875953        | -1.795388 | -1.344143 |
| C             | 3.179698        | -2.703914 | 0.863109  |
| C             | 4.243178        | -1.552802 | -1.414970 |
| H             | 2.239833        | -1.524147 | -2.175871 |
| C             | 4.546315        | -2.461827 | 0.776992  |
| H             | 2.760705        | -3.145753 | 1.761880  |
| C             | 5.103626        | -1.887104 | -0.366165 |
| H             | 4.652818        | -1.090156 | -2.310719 |
| H             | 5.190009        | -2.726405 | 1.612326  |
| C             | -1.985850       | -1.668582 | -0.352480 |

|   |            |           |           |
|---|------------|-----------|-----------|
| C | -1.965971  | -1.104815 | 0.914851  |
| C | -2.587510  | -1.028590 | -1.430076 |
| C | -2.579152  | 0.130789  | 1.106984  |
| H | -1.474984  | -1.624127 | 1.732057  |
| C | -3.197266  | 0.202276  | -1.219378 |
| H | -2.577810  | -1.491486 | -2.412297 |
| C | -3.198521  | 0.795593  | 0.047016  |
| H | -2.572794  | 0.583954  | 2.094084  |
| H | -3.681633  | 0.710642  | -2.048885 |
| C | 6.585281   | -1.589356 | -0.460790 |
| H | 7.107474   | -2.110915 | 0.347668  |
| H | 6.980454   | -1.968611 | -1.408559 |
| C | -3.905683  | 2.116674  | 0.263813  |
| H | -3.585050  | 2.542357  | 1.219232  |
| H | -3.623463  | 2.816897  | -0.528099 |
| C | 6.865074   | -0.104828 | -0.368649 |
| C | 7.231831   | 0.634814  | -1.493334 |
| C | 6.718481   | 0.563496  | 0.852697  |
| C | 7.452373   | 2.007454  | -1.409946 |
| H | 7.351357   | 0.132569  | -2.449295 |
| C | 6.937179   | 1.929674  | 0.954150  |
| H | 6.428229   | 0.001622  | 1.737152  |
| C | 7.304646   | 2.651930  | -0.185479 |
| H | 7.738677   | 2.581272  | -2.284744 |
| H | 6.826858   | 2.444054  | 1.904137  |
| C | -5.408936  | 1.939141  | 0.260709  |
| C | -6.051321  | 1.356028  | 1.356809  |
| C | -6.176220  | 2.308234  | -0.846489 |
| C | -7.424666  | 1.147531  | 1.354430  |
| H | -5.466688  | 1.060968  | 2.224471  |
| C | -7.552067  | 2.105283  | -0.865659 |
| H | -5.692382  | 2.764818  | -1.705532 |
| C | -8.173742  | 1.522254  | 0.238959  |
| H | -7.923823  | 0.696857  | 2.205407  |
| H | -8.145937  | 2.394877  | -1.727194 |
| N | 7.534116   | 4.035757  | -0.124871 |
| N | -9.559162  | 1.298535  | 0.261034  |
| C | 7.516536   | 4.915926  | 0.696806  |
| C | -10.515316 | 1.464535  | -0.451398 |
| O | 7.536611   | 5.863465  | 1.392663  |
| O | -11.526546 | 1.568794  | -1.042247 |

5-I

Geometry with 35 atoms:



Total energy: -990.058970833

|   |           |           |           |
|---|-----------|-----------|-----------|
| N | 3.865182  | 0.830506  | -0.714931 |
| C | 5.128658  | -0.154714 | -0.909873 |
| O | 4.803684  | -1.291765 | -1.204157 |
| O | 6.182123  | 0.452403  | -0.735843 |
| O | 5.322649  | 2.483656  | 1.054249  |
| H | 5.996502  | 1.948444  | 0.601780  |
| H | 4.191449  | 1.586304  | -0.078837 |
| H | 3.694645  | 1.245002  | -1.637665 |
| H | 5.411735  | 3.361787  | 0.660707  |
| C | 2.666888  | 0.190892  | -0.211474 |
| C | 2.440411  | 0.178265  | 1.157240  |
| C | 1.795048  | -0.432368 | -1.097429 |
| C | 1.308393  | -0.469041 | 1.647054  |
| H | 3.136965  | 0.672593  | 1.828275  |
| C | 0.670288  | -1.072322 | -0.593764 |
| H | 1.998076  | -0.410143 | -2.163907 |
| C | 0.416083  | -1.103402 | 0.782216  |
| H | 1.119446  | -0.481420 | 2.716414  |
| H | -0.024156 | -1.553688 | -1.277475 |
| C | -0.816851 | -1.807051 | 1.311973  |
| H | -0.776489 | -2.865379 | 1.033861  |
| H | -0.814638 | -1.754064 | 2.404822  |
| C | -2.093580 | -1.202802 | 0.771278  |
| C | -2.543142 | 0.036951  | 1.241275  |
| C | -2.827081 | -1.844492 | -0.226818 |
| C | -3.696320 | 0.619147  | 0.735014  |
| H | -1.980680 | 0.550953  | 2.016734  |
| C | -3.983942 | -1.272135 | -0.749094 |
| H | -2.491606 | -2.807523 | -0.601268 |
| C | -4.416589 | -0.040852 | -0.265577 |
| H | -4.047544 | 1.577272  | 1.106004  |
| H | -4.552845 | -1.772422 | -1.525222 |
| N | -5.588068 | 0.515486  | -0.803020 |
| C | -6.259806 | 1.504960  | -0.659275 |
| O | -6.999880 | 2.417471  | -0.621128 |

## 5-II

Geometry with 38 atoms:

Total energy: -1066.466989430

|   |          |           |           |
|---|----------|-----------|-----------|
| N | 3.491066 | 0.321025  | -0.675070 |
| C | 4.812792 | -0.514385 | -0.456152 |
| O | 4.691906 | -1.458613 | 0.307014  |
| O | 5.747758 | -0.029092 | -1.102267 |

|   |           |           |           |
|---|-----------|-----------|-----------|
| O | 3.964641  | 2.473846  | 0.850446  |
| H | 4.906401  | 2.607691  | 0.580846  |
| H | 3.639746  | 1.220495  | -0.111028 |
| H | 3.475764  | 0.578286  | -1.666165 |
| O | 6.486308  | 2.493289  | -0.106187 |
| H | 6.324590  | 1.631135  | -0.535049 |
| H | 3.489821  | 3.233692  | 0.487579  |
| H | 7.072624  | 2.283257  | 0.632617  |
| C | 2.255245  | -0.320676 | -0.277347 |
| C | 1.900020  | -0.313313 | 1.064846  |
| C | 1.463611  | -0.950672 | -1.231228 |
| C | 0.723355  | -0.947056 | 1.455264  |
| H | 2.536550  | 0.183553  | 1.790773  |
| C | 0.290456  | -1.576233 | -0.827298 |
| H | 1.763463  | -0.946047 | -2.275106 |
| C | -0.091305 | -1.585310 | 0.518093  |
| H | 0.436790  | -0.948109 | 2.503037  |
| H | -0.340254 | -2.063937 | -1.566120 |
| C | -1.392173 | -2.239941 | 0.931962  |
| H | -1.397100 | -2.374664 | 2.017744  |
| H | -1.467517 | -3.229703 | 0.471626  |
| C | -2.585185 | -1.406080 | 0.515966  |
| C | -2.895195 | -0.228671 | 1.205932  |
| C | -3.370728 | -1.765058 | -0.579776 |
| C | -3.962817 | 0.568902  | 0.819493  |
| H | -2.290224 | 0.065927  | 2.059870  |
| C | -4.444372 | -0.974951 | -0.982129 |
| H | -3.144181 | -2.676534 | -1.125810 |
| C | -4.738153 | 0.190992  | -0.281041 |
| H | -4.203823 | 1.479179  | 1.360248  |
| H | -5.055496 | -1.255423 | -1.833132 |
| N | -5.826837 | 0.969096  | -0.704130 |
| C | -6.378295 | 1.993997  | -0.395072 |
| O | -7.005649 | 2.969456  | -0.202333 |

6-I

Geometry with 61 atoms:

Total energy: -1638.866812290

|   |           |           |           |
|---|-----------|-----------|-----------|
| N | -0.409208 | -2.348458 | -0.251618 |
| C | -0.276264 | -3.189434 | -1.324238 |
| O | -1.228972 | -3.703269 | -1.916702 |
| N | 1.010193  | -3.445041 | -1.731626 |
| H | 2.087305  | -0.804159 | 1.157143  |
| H | 1.066048  | -3.815527 | -2.672310 |

|   |           |           |           |
|---|-----------|-----------|-----------|
| O | 1.635944  | -0.202722 | 0.547442  |
| H | 0.372999  | -1.735442 | -0.021382 |
| H | 2.160967  | -0.278500 | -0.263587 |
| C | -1.645960 | -1.992493 | 0.324582  |
| C | -2.713028 | -2.888139 | 0.430183  |
| C | -1.775034 | -0.707135 | 0.864144  |
| C | -3.896603 | -2.483067 | 1.042244  |
| H | -2.616910 | -3.893659 | 0.041668  |
| C | -2.957911 | -0.323566 | 1.481439  |
| H | -0.940439 | -0.016011 | 0.795193  |
| C | -4.040805 | -1.202147 | 1.575852  |
| H | -4.720540 | -3.188148 | 1.117110  |
| H | -3.045899 | 0.680031  | 1.891098  |
| C | 2.204954  | -2.969176 | -1.136262 |
| C | 3.101781  | -2.205661 | -1.888680 |
| C | 2.506449  | -3.279549 | 0.190252  |
| C | 4.278835  | -1.745744 | -1.309040 |
| H | 2.866428  | -1.972330 | -2.922704 |
| C | 3.680021  | -2.796670 | 0.765677  |
| H | 1.820111  | -3.890735 | 0.767984  |
| C | 4.581310  | -2.025851 | 0.028762  |
| H | 4.967063  | -1.146735 | -1.899805 |
| H | 3.902455  | -3.032767 | 1.802704  |
| C | -5.343017 | -0.750135 | 2.201663  |
| H | -5.954108 | -1.627969 | 2.434303  |
| H | -5.140201 | -0.227943 | 3.141951  |
| C | 5.862131  | -1.517434 | 0.651237  |
| H | 6.715932  | -2.046328 | 0.213157  |
| H | 5.857109  | -1.766031 | 1.718573  |
| C | -6.110485 | 0.172944  | 1.279154  |
| C | -6.174318 | 1.546822  | 1.521446  |
| C | -6.737272 | -0.334231 | 0.136907  |
| C | -6.847876 | 2.399203  | 0.652612  |
| H | -5.693810 | 1.957871  | 2.405071  |
| C | -7.415758 | 0.502238  | -0.739946 |
| H | -6.691800 | -1.400811 | -0.068721 |
| C | -7.469184 | 1.871501  | -0.479240 |
| H | -6.897226 | 3.466767  | 0.844967  |
| H | -7.904664 | 0.107751  | -1.624209 |
| C | 6.081864  | -0.028265 | 0.484179  |
| C | 7.346569  | 0.468294  | 0.159205  |
| C | 5.037574  | 0.882094  | 0.675555  |
| C | 7.574906  | 1.833987  | 0.034886  |
| H | 8.167454  | -0.225218 | -0.000679 |

|   |           |          |           |
|---|-----------|----------|-----------|
| C | 5.249060  | 2.250209 | 0.554431  |
| H | 4.040013  | 0.519922 | 0.909845  |
| C | 6.520254  | 2.725026 | 0.234841  |
| H | 8.559649  | 2.213372 | -0.220714 |
| H | 4.438683  | 2.955905 | 0.702047  |
| N | -8.162180 | 2.695237 | -1.380322 |
| N | 6.705216  | 4.111439 | 0.114950  |
| C | -8.440097 | 3.859044 | -1.512843 |
| C | 7.592996  | 4.883513 | -0.142013 |
| O | 8.362770  | 5.741176 | -0.374553 |
| O | -8.779160 | 4.956987 | -1.762478 |

## 6-II

Geometry with 64 atoms:

Total energy: -1715.264140900

|   |           |           |           |
|---|-----------|-----------|-----------|
| N | 0.849334  | -2.226725 | -0.038183 |
| C | 0.091528  | -2.890059 | -0.956134 |
| O | 0.549125  | -3.553278 | -1.883239 |
| N | -1.298993 | -2.814086 | -0.769885 |
| H | -1.523569 | -3.922317 | 0.897313  |
| H | -1.733034 | -3.300040 | -1.550756 |
| O | -1.487584 | -4.326077 | 1.784192  |
| H | -0.370541 | -3.204932 | 2.579599  |
| H | -0.960883 | -5.126418 | 1.657274  |
| O | 0.270607  | -2.512151 | 2.852594  |
| H | 0.460050  | -2.082057 | 0.894866  |
| H | -0.233646 | -1.926235 | 3.430996  |
| C | 2.259410  | -2.142904 | -0.136142 |
| C | 2.884753  | -1.871276 | -1.357005 |
| C | 3.030733  | -2.271653 | 1.019080  |
| C | 4.267200  | -1.748211 | -1.411304 |
| H | 2.288977  | -1.754827 | -2.255085 |
| C | 4.414723  | -2.135127 | 0.950110  |
| H | 2.542233  | -2.480173 | 1.965436  |
| C | 5.053711  | -1.878339 | -0.262989 |
| H | 4.746212  | -1.535673 | -2.364085 |
| H | 5.006044  | -2.238866 | 1.856268  |
| C | -1.957568 | -1.565798 | -0.494969 |
| C | -1.980279 | -1.023531 | 0.785943  |
| C | -2.619692 | -0.910459 | -1.536936 |
| C | -2.629219 | 0.189467  | 1.012665  |
| H | -1.495978 | -1.541207 | 1.606894  |
| C | -3.284258 | 0.284309  | -1.294428 |
| H | -2.605490 | -1.342482 | -2.533601 |

|   |            |           |           |
|---|------------|-----------|-----------|
| C | -3.287425  | 0.857852  | -0.018763 |
| H | -2.631592  | 0.613881  | 2.013001  |
| H | -3.801566  | 0.786450  | -2.108344 |
| C | 6.552782   | -1.674689 | -0.331229 |
| H | 7.025615   | -2.177997 | 0.517774  |
| H | 6.944960   | -2.123223 | -1.248885 |
| C | -4.034540  | 2.149999  | 0.235016  |
| H | -3.718354  | 2.563145  | 1.197679  |
| H | -3.781341  | 2.879100  | -0.540862 |
| C | 6.904734   | -0.202108 | -0.306400 |
| C | 7.220110   | 0.483675  | -1.480204 |
| C | 6.868956   | 0.511287  | 0.896806  |
| C | 7.495712   | 1.848229  | -1.462047 |
| H | 7.254133   | -0.055935 | -2.422695 |
| C | 7.142627   | 1.871396  | 0.932972  |
| H | 6.622923   | -0.008507 | 1.819341  |
| C | 7.455269   | 2.539472  | -0.254466 |
| H | 7.742862   | 2.380825  | -2.374042 |
| H | 7.118987   | 2.421842  | 1.868649  |
| C | -5.532546  | 1.932191  | 0.240695  |
| C | -6.147113  | 1.287413  | 1.318420  |
| C | -6.323091  | 2.329464  | -0.839889 |
| C | -7.515510  | 1.049124  | 1.324846  |
| H | -5.544249  | 0.968774  | 2.165078  |
| C | -7.694317  | 2.096329  | -0.850774 |
| H | -5.860514  | 2.831479  | -1.685183 |
| C | -8.288114  | 1.454802  | 0.236521  |
| H | -7.993865  | 0.553154  | 2.162434  |
| H | -8.305563  | 2.407226  | -1.692608 |
| N | 7.737498   | 3.914600  | -0.261502 |
| N | -9.668345  | 1.201467  | 0.268021  |
| C | 7.794050   | 4.830259  | 0.518203  |
| C | -10.638619 | 1.378044  | -0.422230 |
| O | 7.884452   | 5.806356  | 1.167563  |
| O | -11.660765 | 1.486807  | -0.993336 |

#### TS2P-3-I

Geometry with 35 atoms:

Total energy: -990.013048273

|   |           |           |           |
|---|-----------|-----------|-----------|
| N | -3.648264 | -0.501363 | 0.952506  |
| C | -4.536808 | -0.804921 | 0.060063  |
| O | -5.600564 | -1.607302 | 0.657072  |
| H | -5.608431 | -1.501400 | 1.623327  |
| O | -4.735118 | -0.613526 | -1.146829 |

|   |           |           |           |
|---|-----------|-----------|-----------|
| H | -7.054150 | -0.790548 | -1.454026 |
| H | -6.608764 | -1.392723 | 0.097219  |
| O | -7.528840 | -1.137903 | -0.677198 |
| H | -8.062946 | -0.401895 | -0.336875 |
| C | -2.512779 | 0.239442  | 0.596804  |
| C | -2.131254 | 0.624588  | -0.701566 |
| C | -1.666096 | 0.616867  | 1.655476  |
| C | -0.959746 | 1.349144  | -0.911362 |
| H | -2.749565 | 0.356597  | -1.547212 |
| C | -0.501077 | 1.337481  | 1.435108  |
| H | -1.947701 | 0.327379  | 2.663588  |
| C | -0.125629 | 1.719849  | 0.143370  |
| H | -0.690422 | 1.633102  | -1.926603 |
| H | 0.130113  | 1.609134  | 2.278453  |
| C | 1.180142  | 2.446318  | -0.104759 |
| H | 1.102061  | 3.033320  | -1.025200 |
| H | 1.380056  | 3.138593  | 0.718981  |
| C | 2.331399  | 1.470462  | -0.228512 |
| C | 3.120227  | 1.145159  | 0.878672  |
| C | 2.587156  | 0.826408  | -1.442030 |
| C | 4.137555  | 0.202667  | 0.783814  |
| H | 2.937626  | 1.637665  | 1.830154  |
| C | 3.601095  | -0.117698 | -1.554740 |
| H | 1.983433  | 1.068559  | -2.312760 |
| C | 4.374075  | -0.430594 | -0.437559 |
| H | 4.748813  | -0.046445 | 1.646127  |
| H | 3.800284  | -0.614976 | -2.497988 |
| N | 5.390015  | -1.389767 | -0.575394 |
| C | 6.224980  | -1.924745 | 0.107486  |
| O | 7.078007  | -2.518895 | 0.657134  |

TS2p-3

Geometry with 32 atoms:

|               |          |           |                |
|---------------|----------|-----------|----------------|
| Total energy: |          |           | -913.580487960 |
| N             | 4.410611 | 0.329517  | -0.569371      |
| C             | 4.678710 | 1.341047  | 0.145503       |
| O             | 5.934640 | 2.054413  | -0.060762      |
| H             | 6.025787 | 2.426290  | -0.960088      |
| O             | 4.186072 | 2.056653  | 1.087879       |
| H             | 5.330745 | 2.670048  | 0.723794       |
| C             | 3.187305 | -0.348719 | -0.355108      |
| C             | 2.541208 | -0.430998 | 0.886861       |
| C             | 2.627909 | -1.016025 | -1.448215      |
| C             | 1.354725 | -1.144238 | 1.010625       |

|   |           |           |           |
|---|-----------|-----------|-----------|
| H | 2.973648  | 0.056678  | 1.753552  |
| C | 1.437578  | -1.723647 | -1.314540 |
| H | 3.136930  | -0.969754 | -2.405871 |
| C | 0.781731  | -1.797364 | -0.084607 |
| H | 0.862215  | -1.198059 | 1.979102  |
| H | 1.015145  | -2.231711 | -2.177722 |
| C | -0.536469 | -2.527127 | 0.061036  |
| H | -0.676135 | -3.191593 | -0.797828 |
| H | -0.520174 | -3.148618 | 0.961625  |
| C | -1.700530 | -1.562846 | 0.148926  |
| C | -2.387596 | -1.366225 | 1.346667  |
| C | -2.086039 | -0.819631 | -0.973378 |
| C | -3.438947 | -0.456661 | 1.431178  |
| H | -2.101223 | -1.934139 | 2.227431  |
| C | -3.132128 | 0.089102  | -0.907320 |
| H | -1.557244 | -0.956966 | -1.913452 |
| C | -3.809372 | 0.268841  | 0.302884  |
| H | -3.972947 | -0.305545 | 2.363114  |
| H | -3.430756 | 0.661548  | -1.780567 |
| N | -4.873560 | 1.177968  | 0.411227  |
| C | -5.472413 | 1.953537  | -0.288577 |
| O | -6.135636 | 2.740828  | -0.856827 |

#### TS2p-3-II

Geometry with 38 atoms:

Total energy: -1066.437456760

|   |           |           |           |
|---|-----------|-----------|-----------|
| N | -3.719090 | -1.258599 | -0.534117 |
| C | -4.269239 | -0.158853 | -0.288117 |
| O | -3.059754 | 1.093196  | 0.196737  |
| H | -2.193253 | 0.934568  | -0.210412 |
| O | -5.325594 | 0.415529  | -0.265066 |
| H | -5.837611 | 1.787649  | 1.006696  |
| H | -4.863045 | 3.235126  | 0.026738  |
| O | -5.971049 | 2.711230  | 1.280425  |
| H | -6.856516 | 2.924098  | 0.957108  |
| H | -3.432412 | 1.969961  | -0.179339 |
| O | -4.142295 | 3.244441  | -0.647531 |
| H | -4.579976 | 2.987336  | -1.471162 |
| C | -2.371256 | -1.597002 | -0.334220 |
| C | -1.732459 | -1.403651 | 0.898960  |
| C | -1.670661 | -2.220074 | -1.369434 |
| C | -0.412745 | -1.801106 | 1.070339  |
| H | -2.280741 | -0.945341 | 1.716165  |
| C | -0.349033 | -2.616618 | -1.184915 |

|   |           |           |           |
|---|-----------|-----------|-----------|
| H | -2.169405 | -2.386902 | -2.318773 |
| C | 0.299535  | -2.412990 | 0.033927  |
| H | 0.074161  | -1.638795 | 2.029315  |
| H | 0.184222  | -3.096997 | -2.001119 |
| C | 1.748993  | -2.804229 | 0.230605  |
| H | 2.056858  | -3.464079 | -0.586476 |
| H | 1.858930  | -3.359692 | 1.167201  |
| C | 2.649859  | -1.588316 | 0.268449  |
| C | 2.917037  | -0.874024 | -0.905282 |
| C | 3.194517  | -1.129065 | 1.467844  |
| C | 3.711372  | 0.263520  | -0.887800 |
| H | 2.494990  | -1.217082 | -1.846765 |
| C | 3.991731  | 0.012277  | 1.503935  |
| H | 2.996151  | -1.671354 | 2.388235  |
| C | 4.249064  | 0.705687  | 0.325043  |
| H | 3.921501  | 0.813342  | -1.800272 |
| H | 4.415565  | 0.368374  | 2.436707  |
| N | 5.057973  | 1.850618  | 0.386179  |
| C | 5.506593  | 2.688628  | -0.351926 |
| O | 6.006011  | 3.564426  | -0.957405 |

TS2-4

Geometry with 32 atoms:

|               |                |           |           |
|---------------|----------------|-----------|-----------|
| Total energy: | -913.596040931 |           |           |
| N             | 4.236467       | 0.782930  | 0.634942  |
| C             | 5.247630       | 0.990202  | -0.176183 |
| O             | 5.633728       | 0.772865  | -1.299280 |
| H             | 5.109479       | 1.547464  | 1.388514  |
| O             | 6.102515       | 1.738803  | 0.810344  |
| H             | 6.263535       | 2.659248  | 0.526552  |
| C             | 3.094625       | 0.029975  | 0.326926  |
| C             | 2.119441       | -0.110331 | 1.323752  |
| C             | 2.887917       | -0.578616 | -0.916071 |
| C             | 0.967327       | -0.843111 | 1.080463  |
| H             | 2.280079       | 0.363367  | 2.287184  |
| C             | 1.725307       | -1.311664 | -1.144536 |
| H             | 3.629707       | -0.477086 | -1.699386 |
| C             | 0.752086       | -1.461046 | -0.156777 |
| H             | 0.217830       | -0.939251 | 1.862795  |
| H             | 1.576050       | -1.779502 | -2.114320 |
| C             | -0.508919      | -2.262021 | -0.407255 |
| H             | -0.533637      | -3.129663 | 0.260966  |
| H             | -0.486194      | -2.644535 | -1.432852 |
| C             | -1.764085      | -1.445107 | -0.196316 |



|   |           |           |           |
|---|-----------|-----------|-----------|
| C | -2.071862 | -0.390521 | -1.064677 |
| C | -2.622223 | -1.699392 | 0.873502  |
| C | -3.207395 | 0.383484  | -0.877902 |
| H | -1.408420 | -0.175138 | -1.898689 |
| C | -3.765163 | -0.929921 | 1.077875  |
| H | -2.396980 | -2.512590 | 1.557872  |
| C | -4.055445 | 0.109656  | 0.200069  |
| H | -3.447186 | 1.198286  | -1.554477 |
| H | -4.431997 | -1.129210 | 1.909852  |
| N | -5.213244 | 0.872488  | 0.422368  |
| C | -5.784524 | 1.805546  | -0.081351 |
| O | -6.439134 | 2.701819  | -0.469100 |

#### TS2-4-I

Geometry with 35 atoms:

|               |                |           |           |
|---------------|----------------|-----------|-----------|
| Total energy: | -990.034695271 |           |           |
| N             | -3.903669      | 0.506612  | -0.073276 |
| C             | -4.775877      | 0.035173  | -0.844443 |
| O             | -5.261346      | -0.769489 | -1.565172 |
| H             | -4.376341      | 2.076818  | 1.069812  |
| O             | -6.043405      | 1.477943  | -0.868006 |
| H             | -6.917131      | 1.075726  | -0.748422 |
| H             | -5.869872      | 2.039474  | -0.069623 |
| O             | -5.048220      | 2.758416  | 1.262673  |
| H             | -4.670914      | 3.571978  | 0.901367  |
| C             | -2.713347      | -0.230355 | 0.163351  |
| C             | -2.367040      | -1.401438 | -0.514824 |
| C             | -1.843777      | 0.282507  | 1.132128  |
| H             | -3.029122      | -1.813912 | -1.269268 |
| C             | -1.164304      | -2.041492 | -0.223318 |
| C             | -0.649389      | -0.365542 | 1.413555  |
| H             | -2.120633      | 1.192929  | 1.655995  |
| C             | -0.290468      | -1.538047 | 0.740461  |
| H             | -0.903249      | -2.950913 | -0.758209 |
| H             | 0.021010       | 0.046199  | 2.164470  |
| C             | 1.038021       | -2.205835 | 1.027051  |
| H             | 1.156109       | -2.348542 | 2.105981  |
| H             | 1.051312       | -3.194655 | 0.558033  |
| C             | 2.195354       | -1.379449 | 0.508150  |
| C             | 3.026387       | -0.671967 | 1.379212  |
| C             | 2.425133       | -1.276150 | -0.867260 |
| C             | 4.063315       | 0.120486  | 0.897531  |
| H             | 2.862031       | -0.741904 | 2.450989  |
| C             | 3.457915       | -0.492315 | -1.364947 |

|   |          |           |           |
|---|----------|-----------|-----------|
| H | 1.782918 | -1.817544 | -1.557609 |
| C | 4.275598 | 0.208285  | -0.478271 |
| H | 4.707712 | 0.669930  | 1.577289  |
| H | 3.638563 | -0.414647 | -2.431674 |
| N | 5.309290 | 0.997928  | -1.006733 |
| C | 6.179140 | 1.729823  | -0.609912 |
| O | 7.064006 | 2.462526  | -0.359478 |

#### TS2-4-II

Geometry with 38 atoms:

Total energy: -1066.441943580

|   |           |           |           |
|---|-----------|-----------|-----------|
| N | -3.666812 | 0.275592  | -0.373099 |
| C | -3.813231 | 1.388623  | -0.926392 |
| O | -3.513783 | 2.371553  | -1.507453 |
| H | -5.059069 | -0.774110 | 0.336524  |
| O | -5.768853 | 1.614298  | -0.672748 |
| H | -5.938333 | 2.544276  | -0.882616 |
| O | -5.711001 | -1.278390 | 0.868129  |
| H | -6.188788 | 0.199573  | 1.724728  |
| H | -6.434201 | -1.459353 | 0.253327  |
| O | -6.312265 | 1.160444  | 1.894980  |
| H | -5.974628 | 1.513882  | 0.298594  |
| H | -7.269243 | 1.274272  | 1.967248  |
| C | -2.374209 | -0.317676 | -0.320612 |
| C | -2.258446 | -1.506823 | 0.402188  |
| C | -1.243994 | 0.216577  | -0.945793 |
| C | -1.028114 | -2.144924 | 0.503268  |
| H | -3.138893 | -1.920565 | 0.883829  |
| C | -0.020078 | -0.436607 | -0.841296 |
| H | -1.315130 | 1.139077  | -1.513458 |
| C | 0.110420  | -1.624553 | -0.117369 |
| H | -0.951537 | -3.066364 | 1.074503  |
| H | 0.849471  | -0.007628 | -1.332014 |
| C | 1.429222  | -2.368947 | -0.033837 |
| H | 1.428206  | -2.971862 | 0.881031  |
| H | 1.496674  | -3.075379 | -0.869540 |
| C | 2.648009  | -1.477385 | -0.051307 |
| C | 2.854025  | -0.535921 | 0.965228  |
| C | 3.585828  | -1.560443 | -1.079895 |
| C | 3.966999  | 0.292017  | 0.961454  |
| H | 2.128557  | -0.449932 | 1.770162  |
| C | 4.709677  | -0.737534 | -1.099193 |
| H | 3.439705  | -2.281447 | -1.879043 |
| C | 4.898294  | 0.186715  | -0.076730 |

|   |          |           |           |
|---|----------|-----------|-----------|
| H | 4.123430 | 1.019543  | 1.752166  |
| H | 5.438618 | -0.807434 | -1.899291 |
| N | 6.038467 | 1.004674  | -0.113754 |
| C | 6.545548 | 1.870796  | 0.552117  |
| O | 7.143887 | 2.719357  | 1.103446  |

#### TS3p-4p

Geometry with 32 atoms:

Total energy: -913.609868630

|   |           |           |           |
|---|-----------|-----------|-----------|
| N | -4.261293 | -0.760446 | -0.694387 |
| C | -5.193978 | -1.171068 | 0.131174  |
| O | -6.043717 | -1.867500 | -0.549601 |
| H | -5.146682 | -1.485040 | -1.379470 |
| O | -5.283677 | -0.947898 | 1.421319  |
| H | -6.075030 | -1.389156 | 1.774777  |
| C | -3.115801 | 0.014275  | -0.473017 |
| C | -2.202836 | 0.134973  | -1.529331 |
| C | -2.851619 | 0.676605  | 0.731341  |
| C | -1.048777 | 0.889621  | -1.378080 |
| H | -2.411977 | -0.372770 | -2.465572 |
| C | -1.687231 | 1.429434  | 0.867083  |
| H | -3.548722 | 0.611712  | 1.558030  |
| C | -0.770927 | 1.551028  | -0.177352 |
| H | -0.347856 | 0.968168  | -2.206059 |
| H | -1.494493 | 1.939065  | 1.807815  |
| C | 0.512676  | 2.336444  | -0.013041 |
| H | 0.663224  | 2.986565  | -0.880598 |
| H | 0.431380  | 2.976234  | 0.871395  |
| C | 1.709593  | 1.421203  | 0.133245  |
| C | 2.621832  | 1.249297  | -0.910260 |
| C | 1.898841  | 0.695693  | 1.313264  |
| C | 3.699169  | 0.378223  | -0.785851 |
| H | 2.489956  | 1.805780  | -1.834262 |
| C | 2.970455  | -0.176093 | 1.455275  |
| H | 1.193002  | 0.815109  | 2.131468  |
| C | 3.870424  | -0.334165 | 0.401110  |
| H | 4.408134  | 0.248763  | -1.598167 |
| H | 3.120095  | -0.735222 | 2.372669  |
| N | 4.944725  | -1.222544 | 0.568254  |
| C | 5.889475  | -1.625536 | -0.059978 |
| O | 6.843292  | -2.098086 | -0.559543 |

#### TS3p-4p-I

Geometry with 35 atoms:

Total energy: -990.059952837

|   |           |           |           |
|---|-----------|-----------|-----------|
| N | -4.035255 | 0.297365  | -0.180911 |
| C | -4.330770 | 1.429951  | 0.407187  |
| O | -5.493517 | 1.965107  | 0.291177  |
| H | -6.127386 | 1.173736  | -0.493106 |
| O | -3.420030 | 2.094453  | 1.130958  |
| H | -3.833611 | 2.914138  | 1.446883  |
| O | -6.267116 | 0.275755  | -1.200472 |
| H | -5.241632 | -0.010688 | -0.920996 |
| H | -6.874900 | -0.353072 | -0.781611 |
| C | -2.788077 | -0.346506 | -0.074923 |
| C | -2.309281 | -1.020979 | -1.202478 |
| C | -2.046664 | -0.419760 | 1.114049  |
| C | -1.111658 | -1.728051 | -1.154387 |
| H | -2.889902 | -0.985413 | -2.119505 |
| C | -0.848897 | -1.122987 | 1.149091  |
| H | -2.416035 | 0.065591  | 2.010148  |
| C | -0.360960 | -1.788179 | 0.020392  |
| H | -0.758579 | -2.245442 | -2.042932 |
| H | -0.283022 | -1.164843 | 2.077291  |
| C | 0.960886  | -2.524903 | 0.076049  |
| H | 1.049983  | -3.168663 | -0.804912 |
| H | 0.988200  | -3.168711 | 0.960884  |
| C | 2.132980  | -1.568659 | 0.126558  |
| C | 2.496320  | -0.837667 | -1.010851 |
| C | 2.846752  | -1.363387 | 1.307324  |
| C | 3.547303  | 0.067371  | -0.976183 |
| H | 1.946074  | -0.982296 | -1.937441 |
| C | 3.902499  | -0.456808 | 1.360611  |
| H | 2.577412  | -1.922370 | 2.199148  |
| C | 4.251039  | 0.256035  | 0.217246  |
| H | 3.829775  | 0.630059  | -1.861071 |
| H | 4.457331  | -0.298493 | 2.279134  |
| N | 5.321447  | 1.161282  | 0.293130  |
| C | 5.909209  | 1.925330  | -0.428419 |
| O | 6.564270  | 2.702328  | -1.019795 |

#### TS3p-4p-II

Geometry with 38 atoms:

Total energy: -1066.471772400

|   |           |          |          |
|---|-----------|----------|----------|
| N | -3.752916 | 0.298046 | 0.050446 |
| C | -3.994811 | 1.583569 | 0.147786 |
| O | -5.151656 | 2.106837 | 0.115447 |
| O | -2.953166 | 2.441185 | 0.263953 |

|   |           |           |           |
|---|-----------|-----------|-----------|
| H | -3.326586 | 3.335823  | 0.292271  |
| O | -5.657491 | -1.266046 | -0.586614 |
| H | -4.815365 | -0.651671 | -0.310945 |
| H | -6.525031 | -0.362974 | -0.418913 |
| O | -7.086201 | 0.619355  | -0.209490 |
| H | -6.267845 | 1.293824  | -0.061297 |
| H | -7.543448 | 0.894672  | -1.018158 |
| H | -5.758678 | -1.922770 | 0.117666  |
| C | -2.460956 | -0.254028 | 0.151674  |
| C | -1.506608 | 0.145739  | 1.101345  |
| C | -2.154326 | -1.338691 | -0.677828 |
| C | -0.283786 | -0.507052 | 1.187173  |
| H | -1.732051 | 0.962976  | 1.777054  |
| C | -0.927300 | -1.989600 | -0.579975 |
| H | -2.893099 | -1.668189 | -1.403114 |
| C | 0.027760  | -1.586165 | 0.352763  |
| H | 0.443938  | -0.179153 | 1.926589  |
| H | -0.711758 | -2.828644 | -1.236796 |
| C | 1.362668  | -2.289208 | 0.469689  |
| H | 1.374175  | -3.143276 | -0.216518 |
| H | 1.483850  | -2.691063 | 1.481336  |
| C | 2.536723  | -1.383837 | 0.164325  |
| C | 3.547349  | -1.172724 | 1.104196  |
| C | 2.629733  | -0.736924 | -1.072438 |
| C | 4.631448  | -0.347047 | 0.823193  |
| H | 3.488148  | -1.663172 | 2.071890  |
| C | 3.705588  | 0.088845  | -1.370506 |
| H | 1.846355  | -0.882622 | -1.811880 |
| C | 4.708179  | 0.281490  | -0.419264 |
| H | 5.414438  | -0.187047 | 1.558197  |
| H | 3.780305  | 0.586407  | -2.331478 |
| N | 5.785468  | 1.119507  | -0.747883 |
| C | 6.803384  | 1.521207  | -0.245804 |
| O | 7.819078  | 1.984989  | 0.122726  |

### TS3p-4p-III

Geometry with 41 atoms:

Total energy: -1142.864759360

|   |           |           |           |
|---|-----------|-----------|-----------|
| N | -3.275429 | 0.358199  | -0.131955 |
| C | -3.403391 | 1.661428  | -0.125926 |
| O | -4.515612 | 2.272047  | -0.080679 |
| O | -2.288607 | 2.437335  | -0.217972 |
| H | -2.589103 | 3.358530  | -0.190635 |
| O | -5.138717 | -1.091030 | -1.268584 |

|   |           |           |           |
|---|-----------|-----------|-----------|
| H | -4.434433 | -0.493728 | -0.808896 |
| H | -6.324751 | -0.921760 | -0.478665 |
| O | -7.112830 | -0.715944 | 0.188029  |
| H | -6.730656 | 0.229292  | 0.779345  |
| O | -6.230038 | 1.181358  | 1.361337  |
| H | -5.520397 | 1.617668  | 0.732151  |
| H | -6.909760 | 1.851688  | 1.522140  |
| H | -7.877142 | -0.451875 | -0.345110 |
| H | -5.292276 | -0.681605 | -2.131293 |
| C | -2.011760 | -0.259022 | -0.081604 |
| C | -1.755695 | -1.333309 | -0.941575 |
| C | -1.026140 | 0.083198  | 0.858463  |
| C | -0.547652 | -2.023783 | -0.883032 |
| H | -2.517549 | -1.620596 | -1.660574 |
| C | 0.175521  | -0.610997 | 0.909642  |
| H | -1.213756 | 0.896494  | 1.552237  |
| C | 0.437597  | -1.676729 | 0.041346  |
| H | -0.370064 | -2.848996 | -1.568336 |
| H | 0.925727  | -0.324294 | 1.643586  |
| C | 1.739824  | -2.447776 | 0.126989  |
| H | 1.733693  | -3.085958 | 1.018017  |
| H | 1.809928  | -3.114978 | -0.739071 |
| C | 2.958439  | -1.554477 | 0.179766  |
| C | 3.259318  | -0.705657 | -0.892843 |
| C | 3.794446  | -1.536956 | 1.296028  |
| C | 4.365712  | 0.130190  | -0.858352 |
| H | 2.613706  | -0.700944 | -1.767420 |
| C | 4.908248  | -0.701979 | 1.349068  |
| H | 3.572996  | -2.184959 | 2.139380  |
| C | 5.191624  | 0.129843  | 0.270663  |
| H | 4.598524  | 0.783346  | -1.694015 |
| H | 5.555467  | -0.689882 | 2.219291  |
| N | 6.318644  | 0.963295  | 0.345298  |
| C | 6.879071  | 1.786730  | -0.331165 |
| O | 7.520351  | 2.602218  | -0.884674 |

TS4pp-5

Geometry with 32 atoms:

|               |                |          |           |
|---------------|----------------|----------|-----------|
| Total energy: | -913.613436992 |          |           |
| N             | 4.292018       | 0.689262 | -0.968111 |
| C             | 5.227318       | 1.197672 | 0.105613  |
| O             | 5.774777       | 0.530059 | 0.946291  |
| H             | 4.806124       | 0.161509 | -1.678891 |
| O             | 5.194900       | 2.457534 | -0.158452 |

|   |           |           |           |
|---|-----------|-----------|-----------|
| H | 4.394050  | 1.977699  | -1.031123 |
| C | 3.134146  | -0.029844 | -0.504457 |
| C | 2.822695  | -1.275192 | -1.031735 |
| C | 2.326621  | 0.555700  | 0.470747  |
| C | 1.685330  | -1.942722 | -0.579327 |
| H | 3.463261  | -1.718429 | -1.788608 |
| C | 1.202824  | -0.124007 | 0.917208  |
| H | 2.577114  | 1.536250  | 0.867520  |
| C | 0.867246  | -1.381029 | 0.399743  |
| H | 1.437969  | -2.916974 | -0.991489 |
| H | 0.567245  | 0.328815  | 1.674019  |
| C | -0.381267 | -2.090122 | 0.881270  |
| H | -0.401231 | -3.101339 | 0.463722  |
| H | -0.352572 | -2.181898 | 1.971670  |
| C | -1.634902 | -1.344676 | 0.478176  |
| C | -2.059107 | -1.351165 | -0.854085 |
| C | -2.366730 | -0.604611 | 1.409395  |
| C | -3.186020 | -0.642739 | -1.250653 |
| H | -1.496512 | -1.918638 | -1.591268 |
| C | -3.495991 | 0.112923  | 1.028561  |
| H | -2.051342 | -0.590633 | 2.449048  |
| C | -3.902659 | 0.091739  | -0.305736 |
| H | -3.517335 | -0.650283 | -2.283393 |
| H | -4.063329 | 0.686176  | 1.755594  |
| N | -5.035347 | 0.801758  | -0.733159 |
| C | -5.880093 | 1.523216  | -0.269139 |
| O | -6.759253 | 2.234875  | 0.051986  |

#### TS4pp-5-I

Geometry with 35 atoms:

|               |                |           |           |
|---------------|----------------|-----------|-----------|
| Total energy: | -990.037559402 |           |           |
| N             | 3.893632       | 0.802345  | -0.541842 |
| C             | 5.223569       | 0.117180  | -0.382938 |
| O             | 5.240062       | -1.104290 | -0.281433 |
| O             | 6.182935       | 0.940069  | -0.358653 |
| O             | 4.828495       | 2.752758  | 0.644593  |
| H             | 5.643635       | 2.237778  | 0.271745  |
| H             | 4.139116       | 1.977269  | 0.196285  |
| H             | 3.860891       | 1.166378  | -1.498242 |
| H             | 4.740538       | 3.586048  | 0.153582  |
| C             | 2.720685       | 0.030832  | -0.254686 |
| C             | 2.551341       | -0.503890 | 1.020050  |
| C             | 1.734379       | -0.142768 | -1.222784 |
| C             | 1.394525       | -1.217376 | 1.317876  |

|   |           |           |           |
|---|-----------|-----------|-----------|
| H | 3.321963  | -0.359189 | 1.771568  |
| C | 0.577977  | -0.849096 | -0.910503 |
| H | 1.874096  | 0.278454  | -2.214581 |
| C | 0.394317  | -1.401274 | 0.360261  |
| H | 1.264965  | -1.635925 | 2.312081  |
| H | -0.192234 | -0.975002 | -1.667252 |
| C | -0.861570 | -2.185888 | 0.684520  |
| H | -0.864239 | -3.120444 | 0.113135  |
| H | -0.845137 | -2.455474 | 1.745257  |
| C | -2.124667 | -1.416675 | 0.370575  |
| C | -2.479460 | -0.298278 | 1.134939  |
| C | -2.941979 | -1.778490 | -0.700196 |
| C | -3.620636 | 0.435354  | 0.844771  |
| H | -1.850418 | 0.000241  | 1.969827  |
| C | -4.089197 | -1.051026 | -1.007756 |
| H | -2.679987 | -2.642952 | -1.303672 |
| C | -4.426237 | 0.054864  | -0.233329 |
| H | -3.895304 | 1.299955  | 1.441634  |
| H | -4.722588 | -1.333498 | -1.841606 |
| N | -5.587042 | 0.772982  | -0.560692 |
| C | -6.197623 | 1.729258  | -0.156722 |
| O | -6.885738 | 2.638052  | 0.130930  |

#### TS4pp-5-II

Geometry with 38 atoms:

Total energy: -1066.454059760

|   |          |           |           |
|---|----------|-----------|-----------|
| N | 3.543986 | 0.309500  | -0.668411 |
| C | 4.825522 | -0.440920 | -0.436929 |
| O | 4.786881 | -1.376668 | 0.361892  |
| O | 5.782147 | 0.040631  | -1.085864 |
| O | 3.953601 | 2.373469  | 0.683582  |
| H | 4.958941 | 2.528860  | 0.492977  |
| H | 3.703603 | 1.430526  | 0.031704  |
| H | 3.532666 | 0.587758  | -1.650896 |
| O | 6.386864 | 2.461201  | 0.047775  |
| H | 6.326026 | 1.604642  | -0.432832 |
| H | 3.466253 | 3.138069  | 0.339217  |
| H | 6.937399 | 2.275111  | 0.821223  |
| C | 2.314154 | -0.334937 | -0.293479 |
| C | 2.004375 | -0.478725 | 1.055362  |
| C | 1.430927 | -0.788879 | -1.270772 |
| C | 0.813063 | -1.098661 | 1.423527  |
| H | 2.695437 | -0.109578 | 1.806789  |
| C | 0.239318 | -1.395391 | -0.891333 |



|   |           |           |           |
|---|-----------|-----------|-----------|
| H | 1.680506  | -0.666581 | -2.321087 |
| C | -0.079955 | -1.568184 | 0.458717  |
| H | 0.574808  | -1.219734 | 2.476669  |
| H | -0.452048 | -1.746494 | -1.653554 |
| C | -1.381690 | -2.234174 | 0.854650  |
| H | -1.381369 | -2.402940 | 1.935842  |
| H | -1.454240 | -3.212125 | 0.367997  |
| C | -2.584647 | -1.401649 | 0.468992  |
| C | -2.898672 | -0.241140 | 1.185907  |
| C | -3.381827 | -1.748262 | -0.622248 |
| C | -3.982121 | 0.549706  | 0.830911  |
| H | -2.284667 | 0.044300  | 2.036490  |
| C | -4.470693 | -0.963955 | -0.994324 |
| H | -3.151950 | -2.646247 | -1.188853 |
| C | -4.769293 | 0.183355  | -0.265371 |
| H | -4.226993 | 1.445960  | 1.393045  |
| H | -5.090306 | -1.235431 | -1.842084 |
| N | -5.874891 | 0.955240  | -0.655407 |
| C | -6.438761 | 1.960510  | -0.306296 |
| O | -7.078985 | 2.918687  | -0.073611 |

#### TS5p-6

Geometry with 58 atoms:

|               |                 |           |           |
|---------------|-----------------|-----------|-----------|
| Total energy: | -1562.386832350 |           |           |
| N             | 1.249474        | -3.122444 | -0.675206 |
| H             | 1.592238        | -3.645160 | -1.485358 |
| H             | 0.191519        | -3.607992 | -0.155966 |
| N             | -0.872648       | -2.865525 | -0.497702 |
| C             | 0.117715        | -2.200575 | -1.078202 |
| O             | 0.263107        | -1.178384 | -1.728956 |
| C             | -2.235713       | -2.543559 | -0.561131 |
| C             | -2.742123       | -1.485788 | -1.332459 |
| C             | -3.125768       | -3.328536 | 0.178244  |
| C             | -4.108805       | -1.236597 | -1.351787 |
| H             | -2.067178       | -0.867525 | -1.911282 |
| C             | -4.491459       | -3.065742 | 0.147889  |
| H             | -2.735015       | -4.145181 | 0.777531  |
| C             | -5.006241       | -2.020192 | -0.619900 |
| H             | -4.488755       | -0.411419 | -1.950359 |
| H             | -5.167925       | -3.685873 | 0.730178  |
| C             | 2.333605        | -2.529426 | 0.059730  |
| C             | 3.647696        | -2.872925 | -0.246490 |
| C             | 2.055939        | -1.632419 | 1.087227  |
| C             | 4.688115        | -2.311305 | 0.483818  |

|   |           |           |           |
|---|-----------|-----------|-----------|
| H | 3.848288  | -3.573496 | -1.051948 |
| C | 3.108154  | -1.076043 | 1.808165  |
| H | 1.028549  | -1.370700 | 1.324099  |
| C | 4.433531  | -1.407614 | 1.519090  |
| H | 5.715294  | -2.572818 | 0.242373  |
| H | 2.894549  | -0.375260 | 2.610374  |
| C | -6.492626 | -1.731137 | -0.662698 |
| H | -6.870227 | -1.886441 | -1.679227 |
| H | -7.010414 | -2.444415 | -0.012985 |
| C | 5.581511  | -0.764749 | 2.268323  |
| H | 6.317891  | -1.527716 | 2.538102  |
| H | 5.203495  | -0.321139 | 3.194435  |
| C | -6.818582 | -0.319025 | -0.229618 |
| C | -7.297392 | 0.625546  | -1.139759 |
| C | -6.613678 | 0.075268  | 1.096605  |
| C | -7.572562 | 1.930769  | -0.744023 |
| H | -7.460293 | 0.337213  | -2.174595 |
| C | -6.886946 | 1.372554  | 1.509577  |
| H | -6.231979 | -0.646278 | 1.814596  |
| C | -7.367547 | 2.300321  | 0.584912  |
| H | -7.945903 | 2.661893  | -1.454768 |
| H | -6.732570 | 1.676841  | 2.539233  |
| C | 6.254001  | 0.301075  | 1.429391  |
| C | 7.489561  | 0.068056  | 0.821635  |
| C | 5.620134  | 1.527545  | 1.209079  |
| C | 8.085163  | 1.031303  | 0.014156  |
| H | 7.995547  | -0.879756 | 0.983598  |
| C | 6.202107  | 2.501257  | 0.407632  |
| H | 4.655245  | 1.720719  | 1.671273  |
| C | 7.436294  | 2.249227  | -0.191453 |
| H | 9.046657  | 0.847352  | -0.455775 |
| H | 5.712339  | 3.454351  | 0.239521  |
| N | -7.637673 | 3.605033  | 1.027852  |
| N | 8.001818  | 3.248797  | -0.998573 |
| C | -8.042243 | 4.644291  | 0.573552  |
| C | 8.986543  | 3.423128  | -1.668733 |
| O | -8.421500 | 5.712487  | 0.261263  |
| O | 9.894837  | 3.722588  | -2.352842 |

TS5p-6-I

Geometry with 61 atoms:

Total energy: -1638.819358850

|   |          |          |          |
|---|----------|----------|----------|
| N | 1.017672 | 0.441194 | 0.043954 |
| C | 0.119590 | 0.198810 | 0.979721 |

|   |           |           |           |
|---|-----------|-----------|-----------|
| O | 0.069871  | -0.598811 | 1.915132  |
| N | -1.074188 | 1.112473  | 0.796982  |
| H | -0.759709 | 1.876171  | -0.163976 |
| H | -1.199447 | 1.612191  | 1.681107  |
| O | -0.109747 | 2.263714  | -1.147180 |
| H | 0.615129  | 1.469631  | -0.768520 |
| H | 0.267477  | 3.131641  | -0.940901 |
| C | 2.231262  | -0.256504 | -0.076332 |
| C | 2.679428  | -1.274621 | 0.775545  |
| C | 3.046469  | 0.116942  | -1.158194 |
| C | 3.906389  | -1.893082 | 0.535605  |
| H | 2.076161  | -1.583453 | 1.617444  |
| C | 4.264618  | -0.505032 | -1.382103 |
| H | 2.701619  | 0.903804  | -1.823612 |
| C | 4.715089  | -1.526904 | -0.538681 |
| H | 4.237369  | -2.684382 | 1.203942  |
| H | 4.878544  | -0.196700 | -2.225384 |
| C | -2.269055 | 0.346393  | 0.505314  |
| C | -3.250706 | 0.167254  | 1.475151  |
| C | -2.402195 | -0.217088 | -0.758911 |
| C | -4.382927 | -0.577447 | 1.165796  |
| H | -3.124992 | 0.611401  | 2.458438  |
| C | -3.537116 | -0.968859 | -1.051729 |
| H | -1.626721 | -0.064871 | -1.504137 |
| C | -4.537189 | -1.159641 | -0.096487 |
| H | -5.158062 | -0.712970 | 1.915813  |
| H | -3.647395 | -1.412008 | -2.037385 |
| C | 6.063805  | -2.175517 | -0.768599 |
| H | 6.121027  | -3.099490 | -0.184564 |
| H | 6.171902  | -2.442557 | -1.824683 |
| C | -5.783729 | -1.957088 | -0.418485 |
| H | -5.903974 | -2.761428 | 0.314296  |
| H | -5.664427 | -2.422177 | -1.401945 |
| C | 7.198091  | -1.254231 | -0.372779 |
| C | 7.967195  | -0.599615 | -1.337325 |
| C | 7.466915  | -1.006504 | 0.976958  |
| C | 8.981809  | 0.279278  | -0.972867 |
| H | 7.772396  | -0.781401 | -2.390773 |
| C | 8.477947  | -0.133981 | 1.358474  |
| H | 6.873910  | -1.504276 | 1.740175  |
| C | 9.234942  | 0.509866  | 0.379489  |
| H | 9.577843  | 0.785156  | -1.726530 |
| H | 8.688798  | 0.055138  | 2.405538  |
| C | -7.025501 | -1.091977 | -0.409082 |

|   |            |           |           |
|---|------------|-----------|-----------|
| C | -7.992165  | -1.228071 | 0.589237  |
| C | -7.210162  | -0.112476 | -1.390228 |
| C | -9.120258  | -0.414044 | 0.613202  |
| H | -7.863333  | -1.983556 | 1.359208  |
| C | -8.331364  | 0.707032  | -1.382291 |
| H | -6.462785  | 0.010777  | -2.170071 |
| C | -9.286899  | 0.553913  | -0.377206 |
| H | -9.870581  | -0.525097 | 1.390168  |
| H | -8.476279  | 1.464178  | -2.145211 |
| N | 10.250974  | 1.386605  | 0.791521  |
| N | -10.410906 | 1.394336  | -0.393736 |
| C | 11.089643  | 2.096837  | 0.300282  |
| C | -11.412367 | 1.573380  | 0.250599  |
| O | -12.421167 | 1.851954  | 0.786241  |
| O | 11.946207  | 2.824379  | -0.045936 |

#### TS5p-6-II

Geometry with 64 atoms:

Total energy: -1715.222395330

|   |           |           |           |
|---|-----------|-----------|-----------|
| N | 0.886785  | -2.579973 | 0.102926  |
| C | 0.123776  | -2.913748 | -0.918668 |
| O | 0.397457  | -3.188081 | -2.098096 |
| N | -1.320155 | -3.004363 | -0.569301 |
| H | -1.551236 | -3.795368 | 0.547221  |
| H | -1.754659 | -3.439299 | -1.384422 |
| O | -1.721924 | -4.329554 | 1.532120  |
| H | -0.902702 | -3.977748 | 2.103963  |
| H | -1.605651 | -5.282573 | 1.392608  |
| O | 0.290610  | -3.340791 | 2.548647  |
| H | 0.531455  | -2.938995 | 1.628992  |
| H | 0.097613  | -2.597264 | 3.136326  |
| C | 2.259694  | -2.354643 | -0.111724 |
| C | 2.793884  | -1.773937 | -1.276058 |
| C | 3.144765  | -2.655115 | 0.933359  |
| C | 4.156807  | -1.526669 | -1.381985 |
| H | 2.133665  | -1.514631 | -2.094812 |
| C | 4.509218  | -2.407337 | 0.814715  |
| H | 2.750005  | -3.093908 | 1.844962  |
| C | 5.040518  | -1.844463 | -0.345853 |
| H | 4.545881  | -1.071868 | -2.290911 |
| H | 5.171912  | -2.659920 | 1.639064  |
| C | -1.937303 | -1.709014 | -0.360294 |
| C | -1.902452 | -1.116558 | 0.897314  |
| C | -2.562418 | -1.062106 | -1.426017 |

|   |            |           |           |
|---|------------|-----------|-----------|
| C | -2.492865  | 0.131350  | 1.084879  |
| H | -1.416407  | -1.628689 | 1.721127  |
| C | -3.157964  | 0.177283  | -1.224100 |
| H | -2.579713  | -1.534613 | -2.404377 |
| C | -3.126560  | 0.791788  | 0.031255  |
| H | -2.462258  | 0.595641  | 2.066770  |
| H | -3.653484  | 0.677545  | -2.052488 |
| C | 6.518199   | -1.538665 | -0.472316 |
| H | 7.060270   | -2.058518 | 0.324252  |
| H | 6.896108   | -1.914294 | -1.428555 |
| C | -3.814261  | 2.124256  | 0.243309  |
| H | -3.483276  | 2.551076  | 1.194902  |
| H | -3.526144  | 2.817497  | -0.552876 |
| C | 6.793209   | -0.052865 | -0.383499 |
| C | 7.144099   | 0.688351  | -1.512176 |
| C | 6.658763   | 0.614949  | 0.839622  |
| C | 7.360964   | 2.061783  | -1.431110 |
| H | 7.254044   | 0.186693  | -2.469609 |
| C | 6.873986   | 1.981793  | 0.938870  |
| H | 6.380450   | 0.052129  | 1.727301  |
| C | 7.225417   | 2.705561  | -0.204924 |
| H | 7.635240   | 2.636675  | -2.309041 |
| H | 6.773145   | 2.495700  | 1.890196  |
| C | -5.319970  | 1.970058  | 0.248059  |
| C | -5.964478  | 1.388619  | 1.344023  |
| C | -6.089073  | 2.357700  | -0.851476 |
| C | -7.340480  | 1.199069  | 1.348639  |
| H | -5.378671  | 1.079211  | 2.205933  |
| C | -7.467763  | 2.173499  | -0.864000 |
| H | -5.604283  | 2.813327  | -1.710509 |
| C | -8.090906  | 1.591155  | 0.240010  |
| H | -7.840767  | 0.749363  | 2.199479  |
| H | -8.062582  | 2.476334  | -1.720337 |
| N | 7.450555   | 4.090241  | -0.146804 |
| N | -9.479051  | 1.385085  | 0.268207  |
| C | 7.436215   | 4.971123  | 0.674111  |
| C | -10.436312 | 1.562755  | -0.439811 |
| O | 7.458356   | 5.919342  | 1.369044  |
| O | -11.448893 | 1.679552  | -1.026124 |
